# Supplementary material for: Reef-Building Corals Do Not Develop Adaptive Mechanisms to Better Cope With Microplastics
Source: Frontiers journal article supplement (doi:10.3389/fmars.2022.863187), 2022-06-29
Supplement: Table_1.XLSX [file Table_1.XLSX]

## Sheet: data_coral_incubations
Incubation ID	Filter ID	Food type	Run ID	Species	Long-term exposure condition	Colony ID	Tank number	Coral surface area (mm²)	Particle count (n)	Visible reactions after 24 h exposure
Plu_C_2_3-ac	AC_R1_F1	Artemia sp. cysts	1	Porites lutea	microplastic exposure	Plu_C	2	2157.3	589	no
Pve_B_6_2-ac	AC_R1_F3	Artemia sp. cysts	1	Pocillopora verrucosa	microplastic exposure	Pve_B	6	6169.9	584	no
Plu_A_5_1-ac	AC_R1_F4	Artemia sp. cysts	1	Porites lutea	microplastic-free	Plu_A	5	3942.8	1437	no
Amu_A_1_1-ac	AC_R1_F5	Artemia sp. cysts	1	Acropora muricata	microplastic-free	Amu_A	1	4395.8	660	no
Plu_B_5_1-ac	AC_R1_F6	Artemia sp. cysts	1	Porites lutea	microplastic-free	Plu_B	5	3989.5	1282	no
Amu_B_5_4-ac	AC_R1_F7	Artemia sp. cysts	1	Acropora muricata	microplastic-free	Amu_B	5	2794.3	1292	no
Pve_C_2_1-ac	AC_R1_F9	Artemia sp. cysts	1	Pocillopora verrucosa	microplastic exposure	Pve_C	2	3336.1	663	no
Amu_C_4_4-ac	AC_R2_F1	Artemia sp. cysts	2	Acropora muricata	microplastic exposure	Amu_C	4	4643.8	1367	no
Pve_B_4_4-ac	AC_R2_F10	Artemia sp. cysts	2	Pocillopora verrucosa	microplastic exposure	Pve_B	4	4383.1	350	no
Amu_C_5_1-ac	AC_R2_F2	Artemia sp. cysts	2	Acropora muricata	microplastic-free	Amu_C	5	4934.9	974	no
Amu_C_1_3-ac	AC_R2_F3	Artemia sp. cysts	2	Acropora muricata	microplastic-free	Amu_C	1	4152.4	935	no
Plu_C_1_1-ac	AC_R2_F4	Artemia sp. cysts	2	Porites lutea	microplastic-free	Plu_C	1	3248.4	690	no
Pve_B_5_1-ac	AC_R2_F6	Artemia sp. cysts	2	Pocillopora verrucosa	microplastic-free	Pve_B	5	5962.7	1536	no
Amu_A_6_4-ac	AC_R2_F8	Artemia sp. cysts	2	Acropora muricata	microplastic exposure	Amu_A	6	5991.4	1283	no
Pve_B_2_4-ac	AC_R3_F1	Artemia sp. cysts	3	Pocillopora verrucosa	microplastic exposure	Pve_B	2	4897.7	1040	no
Plu_A_6_1-ac	AC_R3_F2	Artemia sp. cysts	3	Porites lutea	microplastic exposure	Plu_A	6	3989.8	1545	no
Plu_B_4_4-ac	AC_R3_F4	Artemia sp. cysts	3	Porites lutea	microplastic exposure	Plu_B	4	3915.9	549	no
Amu_C_2_2-ac	AC_R3_F5	Artemia sp. cysts	3	Acropora muricata	microplastic exposure	Amu_C	2	4833.7	1198	yes
Amu_A_2_1-ac	AC_R3_F7	Artemia sp. cysts	3	Acropora muricata	microplastic exposure	Amu_A	2	5745.2	930	no
Pve_C_5_3-ac	AC_R3_F8	Artemia sp. cysts	3	Pocillopora verrucosa	microplastic-free	Pve_C	5	5343.4	1137	no
Hel_A_6_3-ac	AC_R3_F9	Artemia sp. cysts	3	Heliopora coerulea	microplastic exposure	Hel_A	6	8407.6	1190	no
Hel_A_4_3-ac	AC_R4_F1	Artemia sp. cysts	4	Heliopora coerulea	microplastic exposure	Hel_A	4	8398.1	848	no
Hel_A_3_2-ac	AC_R4_F10	Artemia sp. cysts	4	Heliopora coerulea	microplastic-free	Hel_A	3	10321.5	727	no
Pve_B_1_4-ac	AC_R4_F2	Artemia sp. cysts	4	Pocillopora verrucosa	microplastic-free	Pve_B	1	7288	1320	no
Amu_C_6_4-ac	AC_R4_F4	Artemia sp. cysts	4	Acropora muricata	microplastic exposure	Amu_C	6	4406.9	1032	no
Plu_A_1_3-ac	AC_R4_F6	Artemia sp. cysts	4	Porites lutea	microplastic-free	Plu_A	1	3756.7	1227	no
Plu_B_6_3-ac	AC_R4_F8	Artemia sp. cysts	4	Porites lutea	microplastic exposure	Plu_B	6	4337.3	1400	no
Pve_C_1_3-ac	AC_R4_F9	Artemia sp. cysts	4	Pocillopora verrucosa	microplastic-free	Pve_C	1	3902.7	761	no
Hel_A_1_4-ac	AC_R5_F2	Artemia sp. cysts	5	Heliopora coerulea	microplastic-free	Hel_A	1	8066.2	1248	no
Plu_A_4_1-ac	AC_R5_F4	Artemia sp. cysts	5	Porites lutea	microplastic exposure	Plu_A	4	4472.9	1186	yes
Plu_C_5_4-ac	AC_R5_F5	Artemia sp. cysts	5	Porites lutea	microplastic-free	Plu_C	5	4020.8	1200	no
Plu_A_2_2-ac	AC_R5_F6	Artemia sp. cysts	5	Porites lutea	microplastic exposure	Plu_A	2	4341.5	1156	no
Amu_B_6_1-ac	AC_R5_F7	Artemia sp. cysts	5	Acropora muricata	microplastic exposure	Amu_B	6	4363.7	613	no
Amu_B_4_3-ac	AC_R5_F8	Artemia sp. cysts	5	Acropora muricata	microplastic exposure	Amu_B	4	3708.6	979	no
Amu_A_3_4-ac	AC_R6_F2	Artemia sp. cysts	6	Acropora muricata	microplastic-free	Amu_A	3	4918.2	1258	no
Hel_A_2_1-ac	AC_R6_F3	Artemia sp. cysts	6	Heliopora coerulea	microplastic exposure	Hel_A	2	7357.6	1317	no
Pve_B_3_5-ac	AC_R6_F4	Artemia sp. cysts	6	Pocillopora verrucosa	microplastic-free	Pve_B	3	4785.3	803	no
Amu_B_3_5-ac	AC_R6_F5	Artemia sp. cysts	6	Acropora muricata	microplastic-free	Amu_B	3	5481	1374	no
Amu_B_1_5-ac	AC_R6_F6	Artemia sp. cysts	6	Acropora muricata	microplastic-free	Amu_B	1	5980.9	539	yes
Plu_C_3_5-ac	AC_R6_F7	Artemia sp. cysts	6	Porites lutea	microplastic-free	Plu_C	3	3462.8	1197	no
Amu_A_5_3-ac	AC_R6_F9	Artemia sp. cysts	6	Acropora muricata	microplastic-free	Amu_A	5	5188.1	1296	no
Plu_B_3_4-ac	AC_R7_F1	Artemia sp. cysts	7	Porites lutea	microplastic-free	Plu_B	3	4368.4	1186	yes
Plu_A_3_5-ac	AC_R7_F10	Artemia sp. cysts	7	Porites lutea	microplastic-free	Plu_A	3	4491.7	1414	no
Pve_C_3_4-ac	AC_R7_F2	Artemia sp. cysts	7	Pocillopora verrucosa	microplastic-free	Pve_C	3	4670	1105	no
Plu_B_1_4-ac	AC_R7_F4	Artemia sp. cysts	7	Porites lutea	microplastic-free	Plu_B	1	3803.1	1528	no
Plu_C_4_3-ac	AC_R7_F5	Artemia sp. cysts	7	Porites lutea	microplastic exposure	Plu_C	4	3597.2	1349	no
Amu_B_2_5-ac	AC_R7_F6	Artemia sp. cysts	7	Acropora muricata	microplastic exposure	Amu_B	2	5740.7	1325	no
Pve_C_IV-ac	AC_R7_F8	Artemia sp. cysts	7	Pocillopora verrucosa	microplastic exposure	Pve_C	2	3986.9	780	no
Pve_C_6_1-ac	AC_R8_F1	Artemia sp. cysts	8	Pocillopora verrucosa	microplastic exposure	Pve_C	6	4201.7	1146	no
Amu_A_IV-ac	AC_R8_F10	Artemia sp. cysts	8	Acropora muricata	microplastic exposure	Amu_A	2	7452.2	1326	yes
Hel_A_5_1-ac	AC_R8_F3	Artemia sp. cysts	8	Heliopora coerulea	microplastic-free	Hel_A	5	7551	1398	no
Plu_B_2_1-ac	AC_R8_F4	Artemia sp. cysts	8	Porites lutea	microplastic exposure	Plu_B	2	4124.4	1340	no
Amu_C_3_5-ac	AC_R8_F7	Artemia sp. cysts	8	Acropora muricata	microplastic-free	Amu_C	3	5566.8	1511	yes
Plu_C_6_2-ac	AC_R8_F9	Artemia sp. cysts	8	Porites lutea	microplastic exposure	Plu_C	6	3861	1347	yes
Amu_B_5_4-mp	MP_R1_F1	microplastic particles	1	Acropora muricata	microplastic-free	Amu_B	5	2986.85	1066	yes
Plu_C_2_3-mp	MP_R1_F10	microplastic particles	1	Porites lutea	microplastic exposure	Plu_C	2	2402.15	862	no
Pve_C_2_1-mp	MP_R1_F3	microplastic particles	1	Pocillopora verrucosa	microplastic exposure	Pve_C	2	3369.25	888	no
Plu_B_5_1-mp	MP_R1_F4	microplastic particles	1	Porites lutea	microplastic-free	Plu_B	5	4159.67	1080	no
Pve_B_6_2-mp	MP_R1_F7	microplastic particles	1	Pocillopora verrucosa	microplastic exposure	Pve_B	6	6890.15	1055	no
Plu_A_5_1-mp	MP_R1_F8	microplastic particles	1	Porites lutea	microplastic-free	Plu_A	5	4128.79	1043	no
Amu_A_1_1-mp	MP_R1_F9	microplastic particles	1	Acropora muricata	microplastic-free	Amu_A	1	4522.04	1078	yes
Amu_C_5_1-mp	MP_R2_F1	microplastic particles	2	Acropora muricata	microplastic-free	Amu_C	5	4926.23	1447	yes
Amu_C_4_4-mp	MP_R2_F2	microplastic particles	2	Acropora muricata	microplastic exposure	Amu_C	4	5708.88	1400	yes
Amu_A_6_4-mp	MP_R2_F4	microplastic particles	2	Acropora muricata	microplastic exposure	Amu_A	6	6076.67	1353	yes
Amu_C_1_3-mp	MP_R2_F5	microplastic particles	2	Acropora muricata	microplastic-free	Amu_C	1	4203.73	1202	yes
Plu_C_1_1-mp	MP_R2_F6	microplastic particles	2	Porites lutea	microplastic-free	Plu_C	1	3740.72	1274	no
Pve_B_5_1-mp	MP_R2_F8	microplastic particles	2	Pocillopora verrucosa	microplastic-free	Pve_B	5	6681.01	1462	no
Pve_B_4_4-mp	MP_R2_F9	microplastic particles	2	Pocillopora verrucosa	microplastic exposure	Pve_B	4	4564.31	1441	no
Pve_B_2_4-mp	MP_R3_F1	microplastic particles	3	Pocillopora verrucosa	microplastic exposure	Pve_B	2	4753.44	1316	no
Hel_A_6_3-mp	MP_R3_F10	microplastic particles	3	Heliopora coerulea	microplastic exposure	Hel_A	6	8654.39	1425	no
Amu_C_2_2-mp	MP_R3_F3	microplastic particles	3	Acropora muricata	microplastic exposure	Amu_C	4	4678.9	1211	yes
Pve_C_5_3-mp	MP_R3_F4	microplastic particles	3	Pocillopora verrucosa	microplastic-free	Pve_C	5	5443.44	1353	no
Plu_A_6_1-mp	MP_R3_F6	microplastic particles	3	Porites lutea	microplastic exposure	Plu_A	6	4075.5	1361	yes
Amu_A_2_1-mp	MP_R3_F7	microplastic particles	3	Acropora muricata	microplastic exposure	Amu_A	2	5940.56	1237	yes
Plu_B_4_4-mp	MP_R3_F9	microplastic particles	3	Porites lutea	microplastic exposure	Plu_B	4	4092.98	1320	yes
Hel_A_4_3-mp	MP_R4_F1	microplastic particles	4	Heliopora coerulea	microplastic exposure	Hel_A	4	9189.81	607	no
Pve_B_1_4-mp	MP_R4_F10	microplastic particles	4	Pocillopora verrucosa	microplastic-free	Pve_B	1	8167.13	654	no
Amu_C_6_4-mp	MP_R4_F3	microplastic particles	4	Acropora muricata	microplastic exposure	Amu_C	6	4305.33	670	yes
Hel_A_3_2-mp	MP_R4_F4	microplastic particles	4	Heliopora coerulea	microplastic-free	Hel_A	3	11880.1	599	no
Pve_C_1_3-mp	MP_R4_F6	microplastic particles	4	Pocillopora verrucosa	microplastic-free	Pve_C	1	4678.7	570	no
Plu_B_6_3-mp	MP_R4_F7	microplastic particles	4	Porites lutea	microplastic exposure	Plu_B	6	4074.55	545	yes
Plu_A_1_3-mp	MP_R4_F8	microplastic particles	4	Porites lutea	microplastic-free	Plu_A	1	4195.27	604	no
Plu_A_4_1-mp	MP_R5_F1	microplastic particles	5	Porites lutea	microplastic exposure	Plu_A	4	4418.78	987	no
Plu_A_2_2-mp	MP_R5_F10	microplastic particles	5	Porites lutea	microplastic exposure	Plu_A	2	4341.49	857	no
Amu_A_4_4-mp	MP_R5_F3	microplastic particles	5	Acropora muricata	microplastic exposure	Amu_A	4	6052.85	909	yes
Amu_B_4_3-mp	MP_R5_F5	microplastic particles	5	Acropora muricata	microplastic exposure	Amu_B	4	3708.65	957	yes
Amu_B_6_1-mp	MP_R5_F6	microplastic particles	5	Acropora muricata	microplastic exposure	Amu_B	6	4363.75	939	yes
Hel_A_1_4-mp	MP_R5_F7	microplastic particles	5	Heliopora coerulea	microplastic-free	Hel_A	1	8066.16	841	no
Plu_C_5_4-mp	MP_R5_F9	microplastic particles	5	Porites lutea	microplastic-free	Plu_C	5	4020.82	892	no
Pve_B_3_5-mp	MP_R6_F1	microplastic particles	6	Pocillopora verrucosa	microplastic-free	Pve_B	3	4785.33	327	no
Amu_A_3_4-mp	MP_R6_F10	microplastic particles	6	Acropora muricata	microplastic-free	Amu_A	3	4918.19	289	no
Amu_B_1_5-mp	MP_R6_F3	microplastic particles	6	Acropora muricata	microplastic-free	Amu_B	1	5980.85	264	no
Amu_A_5_3-mp	MP_R6_F4	microplastic particles	6	Acropora muricata	microplastic-free	Amu_A	5	5188.05	314	no
Amu_B_3_5-mp	MP_R6_F7	microplastic particles	6	Acropora muricata	microplastic-free	Amu_B	3	5481.03	278	no
Hel_A_2_1-mp	MP_R6_F8	microplastic particles	6	Heliopora coerulea	microplastic exposure	Hel_A	2	7357.64	319	no
Plu_C_3_5-mp	MP_R6_F9	microplastic particles	6	Porites lutea	microplastic-free	Plu_C	3	3462.84	318	no
Plu_A_3_5-mp	MP_R7_F1	microplastic particles	7	Porites lutea	microplastic-free	Plu_A	3	4491.71	447	yes
Plu_B_1_4-mp	MP_R7_F3	microplastic particles	7	Porites lutea	microplastic-free	Plu_B	1	3803.07	424	no
Amu_B_2_5-mp	MP_R7_F4	microplastic particles	7	Acropora muricata	microplastic exposure	Amu_B	2	5740.68	444	no
Plu_B_3_4-mp	MP_R7_F5	microplastic particles	7	Porites lutea	microplastic-free	Plu_B	3	4368.4	441	yes
Plu_C_4_3-mp	MP_R7_F6	microplastic particles	7	Porites lutea	microplastic exposure	Plu_C	4	3597.2	392	no
Pve_C_3_4-mp	MP_R7_F7	microplastic particles	7	Pocillopora verrucosa	microplastic-free	Pve_C	3	4670.01	325	no
Pve_C_IV-mp	MP_R7_F9	microplastic particles	7	Pocillopora verrucosa	microplastic exposure	Pve_C	2	3986.85	426	no
Hel_A_5_1-mp	MP_R8_F2	microplastic particles	8	Heliopora coerulea	microplastic-free	Hel_A	5	7551.03	472	no
Plu_B_2_1-mp	MP_R8_F3	microplastic particles	8	Porites lutea	microplastic exposure	Plu_B	2	4124.39	295	no
Plu_C_6_2-mp	MP_R8_F4	microplastic particles	8	Porites lutea	microplastic exposure	Plu_C	6	3861.03	408	no
Pve_C_6_1-mp	MP_R8_F6	microplastic particles	8	Pocillopora verrucosa	microplastic exposure	Pve_C	6	4201.67	384	no
Amu_A_IV-mp	MP_R8_F8	microplastic particles	8	Acropora muricata	microplastic exposure	Amu_A	2	7452.19	425	no
Amu_C_3_5-mp	MP_R8_F9	microplastic particles	8	Acropora muricata	microplastic-free	Amu_C	3	5566.82	423	yes

## Sheet: legend_data_coral_incubations
Abbreviation	Explanation
Incubation ID	Identifier of a coral fragment in the pulse-exposure incubation
Filter ID	Identifier of filter on which the particles were photographed
Food type	Food type provided during the incubation
Run ID	Identifier of the 8 consequtive 24 h pulse-exposure runs conducted
Species	Species names
Long-term exposure condition	Long term exposure condition during the 15-month experiment: Microplastic exposure or microplastic-free
Colony ID	Identifier for the origin colony of the studied coral fragments
Tank number	Number of the tank the coral fragment was located in during the 15 month long-term exposure
Coral surface area (mm²)	Tissue surface area of a coral fragment in mm²
Particle count (n)	Number of particles counted on a filter; used to calculate feeding rate
Visible reactions after 24 h exposure	Coral reaction to the food type during the 24 h pulse exposure condition

## Sheet: data_control_incubations
Incubation ID	Filter ID	Food type	Number of run	Replicate	Particle count (n)
ac1_1	AC_R1_F10	Artemia sp. cysts	1	1	1339
ac1_2	AC_R1_F2	Artemia sp. cysts	1	2	1443
ac1_3	AC_R1_F8	Artemia sp. cysts	1	3	1178
ac2_1	AC_R2_F5	Artemia sp. cysts	2	1	1658
ac2_2	AC_R2_F7	Artemia sp. cysts	2	2	1219
ac2_3	AC_R2_F9	Artemia sp. cysts	2	3	1201
ac3_1	AC_R3_F10	Artemia sp. cysts	3	1	1366
ac3_2	AC_R3_F3	Artemia sp. cysts	3	2	1396
ac3_3	AC_R3_F6	Artemia sp. cysts	3	3	1620
ac4_1	AC_R4_F3	Artemia sp. cysts	4	1	1495
ac4_2	AC_R4_F5	Artemia sp. cysts	4	2	1510
ac4_3	AC_R4_F7	Artemia sp. cysts	4	3	1404
ac5_1	AC_R5_F1	Artemia sp. cysts	5	1	1459
ac5_2	AC_R5_F3	Artemia sp. cysts	5	2	1439
ac5_3	AC_R5_F9	Artemia sp. cysts	5	3	1256
ac6_1	AC_R6_F1	Artemia sp. cysts	6	1	1551
ac6_2	AC_R6_F10	Artemia sp. cysts	6	2	1310
ac6_3	AC_R6_F8	Artemia sp. cysts	6	3	1357
ac7_1	AC_R7_F3	Artemia sp. cysts	7	1	1454
ac7_2	AC_R7_F7	Artemia sp. cysts	7	2	1434
ac7_3	AC_R7_F9	Artemia sp. cysts	7	3	1263
ac8_1	AC_R8_F2	Artemia sp. cysts	8	1	1531
ac8_2	AC_R8_F5	Artemia sp. cysts	8	2	1203
ac8_3	AC_R8_F6	Artemia sp. cysts	8	3	1670
ac8_4	AC_R8_F8	Artemia sp. cysts	8	4	1506
mp1_1	MP_R1_F2	microplastic particles	1	1	1050
mp1_2	MP_R1_F5	microplastic particles	1	2	1035
mp1_3	MP_R1_F6	microplastic particles	1	3	1020
mp2_1	MP_R2_F10	microplastic particles	2	1	1478
mp2_2	MP_R2_F3	microplastic particles	2	2	1657
mp2_3	MP_R2_F7	microplastic particles	2	3	1534
mp3_1	MP_R3_F2	microplastic particles	3	1	1351
mp3_2	MP_R3_F5	microplastic particles	3	2	1310
mp3_3	MP_R3_F8	microplastic particles	3	3	1263
mp4_1	MP_R4_F2	microplastic particles	4	1	648
mp4_2	MP_R4_F5	microplastic particles	4	2	633
mp4_3	MP_R4_F9	microplastic particles	4	3	584
mp5_1	MP_R5_F2	microplastic particles	5	1	1081
mp5_2	MP_R5_F4	microplastic particles	5	2	964
mp5_3	MP_R5_F8	microplastic particles	5	3	943
mp6_1	MP_R6_F2	microplastic particles	6	1	298
mp6_2	MP_R6_F5	microplastic particles	6	2	319
mp6_3	MP_R6_F6	microplastic particles	6	3	327
mp7_1	MP_R7_F10	microplastic particles	7	1	422
mp7_2	MP_R7_F2	microplastic particles	7	2	446
mp7_3	MP_R7_F8	microplastic particles	7	3	450
mp8_1	MP_R8_F1	microplastic particles	8	1	418
mp8_2	MP_R8_F10	microplastic particles	8	2	413
mp8_3	MP_R8_F5	microplastic particles	8	3	434
mp8_4	MP_R8_F7	microplastic particles	8	4	396

## Sheet: legend_data_control_incubations
Abbreviation	Explanation
Incubation ID	Identifier of the control pulse-exposure incubation (lacking the coral fragment)
Filter ID	Identifier of filter on which the particles were photographed
Food type	Food type provided during the incubation
Number of run	Identifier of the 8 consequtive 24 h pulse-exposure runs conducted
Replicate	Number of replicate control pulse-exposure incubation
Particle count (n)	Number of particles counted on a filter; used to calculate feeding rate

## Sheet: calculated_feeding_rates
Incubation ID	Filter ID	Coral surface area (mm²)	Particle count (n)	Number of particles in control chambers (mean per run)	SD of particle count in control chambers per run	Number of particles ingested per coral	Number of particles ingested per cm2 coral tissue
Plu_C_2_3-ac	AC_R1_F1	2157.3	589	1407.69	53.2201	818.688	37.9496
Pve_B_6_2-ac	AC_R1_F3	6169.9	584	1407.69	53.2201	823.688	13.3501
Plu_A_5_1-ac	AC_R1_F4	3942.8	1437	1407.69	53.2201	-29.3125	-0.743444
Amu_A_1_1-ac	AC_R1_F5	4395.8	660	1407.69	53.2201	747.688	17.0091
Plu_B_5_1-ac	AC_R1_F6	3989.5	1282	1407.69	53.2201	125.688	3.15046
Amu_B_5_4-ac	AC_R1_F7	2794.3	1292	1407.69	53.2201	115.688	4.14012
Pve_C_2_1-ac	AC_R1_F9	3336.1	663	1407.69	53.2201	744.688	22.3221
Amu_C_4_4-ac	AC_R2_F1	4643.8	1367	1407.69	53.2201	40.6875	0.876168
Pve_B_4_4-ac	AC_R2_F10	4383.1	350	1407.69	53.2201	1057.69	24.131
Amu_C_5_1-ac	AC_R2_F2	4934.9	974	1407.69	53.2201	433.688	8.78817
Amu_C_1_3-ac	AC_R2_F3	4152.4	935	1407.69	53.2201	472.688	11.3835
Plu_C_1_1-ac	AC_R2_F4	3248.4	690	1407.69	53.2201	717.688	22.0936
Pve_B_5_1-ac	AC_R2_F6	5962.7	1536	1407.69	53.2201	-128.312	-2.15192
Amu_A_6_4-ac	AC_R2_F8	5991.4	1283	1407.69	53.2201	124.688	2.08111
Pve_B_2_4-ac	AC_R3_F1	4897.7	1040	1407.69	53.2201	367.688	7.50735
Plu_A_6_1-ac	AC_R3_F2	3989.8	1545	1407.69	53.2201	-137.312	-3.44159
Plu_B_4_4-ac	AC_R3_F4	3915.9	549	1407.69	53.2201	858.688	21.9282
Amu_C_2_2-ac	AC_R3_F5	4833.7	1198	1407.69	53.2201	209.688	4.33803
Amu_A_2_1-ac	AC_R3_F7	5745.2	930	1407.69	53.2201	477.688	8.31455
Pve_C_5_3-ac	AC_R3_F8	5343.4	1137	1407.69	53.2201	270.688	5.06583
Hel_A_6_3-ac	AC_R3_F9	8407.6	1190	1407.69	53.2201	217.688	2.58918
Hel_A_4_3-ac	AC_R4_F1	8398.1	848	1407.69	53.2201	559.688	6.66445
Hel_A_3_2-ac	AC_R4_F10	10321.5	727	1407.69	53.2201	680.688	6.59485
Pve_B_1_4-ac	AC_R4_F2	7288	1320	1407.69	53.2201	87.6875	1.20318
Amu_C_6_4-ac	AC_R4_F4	4406.9	1032	1407.69	53.2201	375.688	8.52498
Plu_A_1_3-ac	AC_R4_F6	3756.7	1227	1407.69	53.2201	180.688	4.80974
Plu_B_6_3-ac	AC_R4_F8	4337.3	1400	1407.69	53.2201	7.6875	0.177242
Pve_C_1_3-ac	AC_R4_F9	3902.7	761	1407.69	53.2201	646.688	16.5703
Hel_A_1_4-ac	AC_R5_F2	8066.2	1248	1407.69	53.2201	159.688	1.97971
Plu_A_4_1-ac	AC_R5_F4	4472.9	1186	1407.69	53.2201	221.688	4.95624
Plu_C_5_4-ac	AC_R5_F5	4020.8	1200	1407.69	53.2201	207.688	5.16533
Plu_A_2_2-ac	AC_R5_F6	4341.5	1156	1407.69	53.2201	251.688	5.79725
Amu_B_6_1-ac	AC_R5_F7	4363.7	613	1407.69	53.2201	794.688	18.2113
Amu_B_4_3-ac	AC_R5_F8	3708.6	979	1407.69	53.2201	428.688	11.5593
Amu_A_3_4-ac	AC_R6_F2	4918.2	1258	1407.69	53.2201	149.688	3.04354
Hel_A_2_1-ac	AC_R6_F3	7357.6	1317	1407.69	53.2201	90.6875	1.23257
Pve_B_3_5-ac	AC_R6_F4	4785.3	803	1407.69	53.2201	604.688	12.6364
Amu_B_3_5-ac	AC_R6_F5	5481	1374	1407.69	53.2201	33.6875	0.614623
Amu_B_1_5-ac	AC_R6_F6	5980.9	539	1407.69	53.2201	868.688	14.5244
Plu_C_3_5-ac	AC_R6_F7	3462.8	1197	1407.69	53.2201	210.688	6.08431
Amu_A_5_3-ac	AC_R6_F9	5188.1	1296	1407.69	53.2201	111.688	2.15276
Plu_B_3_4-ac	AC_R7_F1	4368.4	1186	1407.69	53.2201	221.688	5.0748
Plu_A_3_5-ac	AC_R7_F10	4491.7	1414	1407.69	53.2201	-6.3125	-0.140537
Pve_C_3_4-ac	AC_R7_F2	4670	1105	1407.69	53.2201	302.688	6.48153
Plu_B_1_4-ac	AC_R7_F4	3803.1	1528	1407.69	53.2201	-120.312	-3.16354
Plu_C_4_3-ac	AC_R7_F5	3597.2	1349	1407.69	53.2201	58.6875	1.63148
Amu_B_2_5-ac	AC_R7_F6	5740.7	1325	1407.69	53.2201	82.6875	1.44037
Pve_C_IV-ac	AC_R7_F8	3986.9	780	1407.69	53.2201	627.688	15.7437
Pve_C_6_1-ac	AC_R8_F1	4201.7	1146	1407.69	53.2201	261.688	6.22813
Amu_A_IV-ac	AC_R8_F10	7452.2	1326	1407.69	53.2201	81.6875	1.09615
Hel_A_5_1-ac	AC_R8_F3	7551	1398	1407.69	53.2201	9.6875	0.128294
Plu_B_2_1-ac	AC_R8_F4	4124.4	1340	1407.69	53.2201	67.6875	1.64115
Amu_C_3_5-ac	AC_R8_F7	5566.8	1511	1407.69	53.2201	-103.312	-1.85587
Plu_C_6_2-ac	AC_R8_F9	3861	1347	1407.69	53.2201	60.6875	1.57181
Amu_B_5_4-mp	MP_R1_F1	2986.85	1066	1035	15	-31	-1.03788
Plu_C_2_3-mp	MP_R1_F10	2402.15	862	1035	15	173	7.20188
Pve_C_2_1-mp	MP_R1_F3	3369.25	888	1035	15	147	4.36299
Plu_B_5_1-mp	MP_R1_F4	4159.67	1080	1035	15	-45	-1.08182
Pve_B_6_2-mp	MP_R1_F7	6890.15	1055	1035	15	-20	-0.290269
Plu_A_5_1-mp	MP_R1_F8	4128.79	1043	1035	15	-8	-0.193761
Amu_A_1_1-mp	MP_R1_F9	4522.04	1078	1035	15	-43	-0.950898
Amu_C_5_1-mp	MP_R2_F1	4926.23	1447	1556.33	91.566	109.333	2.21941
Amu_C_4_4-mp	MP_R2_F2	5708.88	1400	1556.33	91.566	156.333	2.73842
Amu_A_6_4-mp	MP_R2_F4	6076.67	1353	1556.33	91.566	203.333	3.34613
Amu_C_1_3-mp	MP_R2_F5	4203.73	1202	1556.33	91.566	354.333	8.42902
Plu_C_1_1-mp	MP_R2_F6	3740.72	1274	1556.33	91.566	282.333	7.54757
Pve_B_5_1-mp	MP_R2_F8	6681.01	1462	1556.33	91.566	94.3333	1.41196
Pve_B_4_4-mp	MP_R2_F9	4564.31	1441	1556.33	91.566	115.333	2.52685
Pve_B_2_4-mp	MP_R3_F1	4753.44	1316	1308	44.0341	-8	-0.168299
Hel_A_6_3-mp	MP_R3_F10	8654.39	1425	1308	44.0341	-117	-1.35192
Amu_C_2_2-mp	MP_R3_F3	4678.9	1211	1308	44.0341	97	2.07314
Pve_C_5_3-mp	MP_R3_F4	5443.44	1353	1308	44.0341	-45	-0.826683
Plu_A_6_1-mp	MP_R3_F6	4075.5	1361	1308	44.0341	-53	-1.30045
Amu_A_2_1-mp	MP_R3_F7	5940.56	1237	1308	44.0341	71	1.19517
Plu_B_4_4-mp	MP_R3_F9	4092.98	1320	1308	44.0341	-12	-0.293185
Hel_A_4_3-mp	MP_R4_F1	9189.81	607	621.667	33.4714	14.6667	0.159597
Pve_B_1_4-mp	MP_R4_F10	8167.13	654	621.667	33.4714	-32.3333	-0.395896
Amu_C_6_4-mp	MP_R4_F3	4305.33	670	621.667	33.4714	-48.3333	-1.12264
Hel_A_3_2-mp	MP_R4_F4	11880.1	599	621.667	33.4714	22.6667	0.190795
Pve_C_1_3-mp	MP_R4_F6	4678.7	570	621.667	33.4714	51.6667	1.1043
Plu_B_6_3-mp	MP_R4_F7	4074.55	545	621.667	33.4714	76.6667	1.8816
Plu_A_1_3-mp	MP_R4_F8	4195.27	604	621.667	33.4714	17.6667	0.421109
Plu_A_4_1-mp	MP_R5_F1	4418.78	987	996	74.3572	9	0.203676
Plu_A_2_2-mp	MP_R5_F10	4341.49	857	996	74.3572	139	3.20167
Amu_A_4_4-mp	MP_R5_F3	6052.85	909	996	74.3572	87	1.43734
Amu_B_4_3-mp	MP_R5_F5	3708.65	957	996	74.3572	39	1.0516
Amu_B_6_1-mp	MP_R5_F6	4363.75	939	996	74.3572	57	1.30622
Hel_A_1_4-mp	MP_R5_F7	8066.16	841	996	74.3572	155	1.92161
Plu_C_5_4-mp	MP_R5_F9	4020.82	892	996	74.3572	104	2.58654
Pve_B_3_5-mp	MP_R6_F1	4785.33	327	314.667	14.9778	-12.3333	-0.257732
Amu_A_3_4-mp	MP_R6_F10	4918.19	289	314.667	14.9778	25.6667	0.521872
Amu_B_1_5-mp	MP_R6_F3	5980.85	264	314.667	14.9778	50.6667	0.847148
Amu_A_5_3-mp	MP_R6_F4	5188.05	314	314.667	14.9778	0.666667	0.01285
Amu_B_3_5-mp	MP_R6_F7	5481.03	278	314.667	14.9778	36.6667	0.668974
Hel_A_2_1-mp	MP_R6_F8	7357.64	319	314.667	14.9778	-4.33333	-0.0588957
Plu_C_3_5-mp	MP_R6_F9	3462.84	318	314.667	14.9778	-3.33333	-0.0962601
Plu_A_3_5-mp	MP_R7_F1	4491.71	447	439.333	15.1438	-7.66667	-0.170685
Plu_B_1_4-mp	MP_R7_F3	3803.07	424	439.333	15.1438	15.3333	0.403183
Amu_B_2_5-mp	MP_R7_F4	5740.68	444	439.333	15.1438	-4.66667	-0.0812912
Plu_B_3_4-mp	MP_R7_F5	4368.4	441	439.333	15.1438	-1.66667	-0.0381528
Plu_C_4_3-mp	MP_R7_F6	3597.2	392	439.333	15.1438	47.3333	1.31584
Pve_C_3_4-mp	MP_R7_F7	4670.01	325	439.333	15.1438	114.333	2.44825
Pve_C_IV-mp	MP_R7_F9	3986.85	426	439.333	15.1438	13.3333	0.334433
Hel_A_5_1-mp	MP_R8_F2	7551.03	472	415.25	15.6498	-56.75	-0.751553
Plu_B_2_1-mp	MP_R8_F3	4124.39	295	415.25	15.6498	120.25	2.91558
Plu_C_6_2-mp	MP_R8_F4	3861.03	408	415.25	15.6498	7.25	0.187774
Pve_C_6_1-mp	MP_R8_F6	4201.67	384	415.25	15.6498	31.25	0.743752
Amu_A_IV-mp	MP_R8_F8	7452.19	425	415.25	15.6498	-9.75	-0.130834
Amu_C_3_5-mp	MP_R8_F9	5566.82	423	415.25	15.6498	-7.75	-0.139218

## Sheet: legend_calculated_feeding_rates
Abbreviation	Explanation
Incubation ID	Identifier of a pulse-exposure incubation
Filter ID	Identifier of filter on which the particles were photographed
Coral surface area (mm²)	Tissue surface area of the coral fragment in mm²
Particle count (n)	Number of particles counted on a filter; used to calculate feeding rate
Number of particles in control chambers (mean per run)	Mean particle count per run based on control counts
SD of particle count in control chambers per run	Standard deviation of the particle count per run
Number of particles ingested per coral	Calculated feeding rate per coral
Number of particles ingested per cm2 coral tissue	Calculated feeding rate per cm2 coral tissue

## Sheet: artemia_cyst_shape_parameters
Artemia sp. cyst number	Perimeter (µm)	Width (µm)
1	570.467	195.036
2	559.903	181.585
3	599.111	188.311
4	714.969	221.938
5	591.733	181.585
6	514.984	154.684
7	544.472	188.311
8	550.851	174.86
9	580.493	174.86
10	589.488	181.585
11	548.115	168.135
12	593.698	181.585
13	547.213	141.233
14	591.733	181.585
15	636.038	195.036
16	485.776	154.684
17	598.737	195.036
18	576.074	188.311
19	557.951	174.86
20	578.936	188.311
21	638.686	188.311
22	579.499	181.585
23	531.748	168.135
24	582.491	181.585
25	542.276	161.409
26	600.73	188.311
27	502.626	154.684
28	523.299	161.409
29	571.186	181.585
30	591.772	174.86
31	588.283	181.585
32	579.715	181.585
33	541.636	174.86
34	505.692	154.684
35	569.635	188.311
36	536.998	161.409
37	582.028	174.86
38	594.145	181.585
39	607.892	188.311
40	541.79	168.135
41	549.422	168.135
42	525.974	168.135
43	545.027	174.86
44	678.693	215.212
45	555.431	174.86
46	599.764	174.86
47	553.343	161.409
48	587.592	174.86
49	507.109	154.684
50	569.355	174.86
51	607.177	188.311
52	570.466	181.585
53	597.776	168.135
54	576.555	181.585
55	552.847	174.86
56	582.458	174.86
57	532.241	147.958
58	604.72	181.585
59	503.69	147.958
60	538.051	181.585
61	536.933	168.135
62	529.369	161.409
63	582.173	161.409
64	583.947	181.585
65	560.985	181.585
66	585.102	195.036
67	573.395	181.585
68	555.375	154.684
69	477.776	161.409
70	567.291	161.409
71	574.829	188.311
72	547.877	154.684
73	562.59	161.409
74	485.028	147.958
75	542.305	154.684
76	535.259	168.135
77	467.44	147.958
78	488.951	134.508
79	554.279	168.135
80	571.436	168.135
81	476.255	147.958
82	539.425	174.86
83	534.444	154.684
84	603.811	174.86
85	580.37	181.585
86	588.681	195.036
87	528.443	161.409
88	619.038	201.761
89	526.945	154.684
90	510.843	141.233
91	511.248	154.684
92	554.495	168.135
93	581.208	188.311
94	517.846	147.958
95	602.939	181.585
96	591.949	181.585
97	580.432	174.86
98	619.82	188.311
99	566.729	181.585
100	533.758	161.409

## Sheet: legend_artemia_cyst_shape_param
Abbreviation	Explanation
Artemia sp. cyst number	Number of a single Artemia sp. cyst
Perimeter (µm)	Perimeter of an Artemia sp. cyst in µm
Width (µm)	Width of an Artemia sp. cyst in µm

## Sheet: microplastic_shape_parameters
Number of microplastic particle	Filter ID	Perimeter (µm)	Width (µm)
1	MP_R1_F1	60.142	27
2	MP_R1_F1	123.054	37
3	MP_R1_F1	139.196	47
4	MP_R1_F1	183.681	64
5	MP_R1_F1	304.208	90
6	MP_R1_F1	300.693	121
7	MP_R1_F1	282.735	92
8	MP_R1_F1	294.007	99
9	MP_R1_F1	297.664	83
10	MP_R1_F1	321.12	100
11	MP_R1_F1	148.569	32
12	MP_R1_F1	158.811	41
13	MP_R1_F1	144.51	47
14	MP_R1_F1	329.907	83
15	MP_R1_F1	79.841	29
16	MP_R1_F1	138.853	43
17	MP_R1_F1	78.426	24
18	MP_R1_F1	123.255	29
19	MP_R1_F1	176.995	63
20	MP_R1_F1	171.255	33
21	MP_R1_F1	122.083	29
22	MP_R1_F1	67.255	27
23	MP_R1_F1	87.64	29
24	MP_R1_F1	219.279	58
25	MP_R1_F1	47.456	16
26	MP_R1_F1	43.698	12
27	MP_R1_F1	115.497	35
28	MP_R1_F1	93.255	27
29	MP_R1_F1	160.995	57
30	MP_R1_F1	126.77	30
31	MP_R1_F1	155.054	55
32	MP_R1_F1	292.291	63
33	MP_R1_F1	229.723	79
34	MP_R1_F1	269.22	78
35	MP_R1_F1	104.811	27
36	MP_R1_F1	65.941	13
37	MP_R1_F1	67.012	15
38	MP_R1_F1	153.095	30
39	MP_R1_F1	255.279	68
40	MP_R1_F1	83.355	20
41	MP_R1_F1	175.681	42
42	MP_R1_F1	239.522	67
43	MP_R1_F1	234.167	62
44	MP_R1_F1	143.882	38
45	MP_R1_F1	51.213	10
46	MP_R1_F1	139.882	53
47	MP_R1_F1	218.693	73
48	MP_R1_F1	200.995	54
49	MP_R1_F1	289.362	76
50	MP_R1_F1	171.924	45
51	MP_R1_F1	136.368	49
52	MP_R1_F1	221.765	60
53	MP_R1_F1	135.924	43
54	MP_R1_F1	168.267	57
55	MP_R1_F1	235.037	64
56	MP_R1_F1	385.061	135
57	MP_R1_F1	71.941	27
58	MP_R1_F1	174.953	60
59	MP_R1_F1	227.664	69
60	MP_R1_F1	89.74	25
61	MP_R1_F1	127.095	38
62	MP_R1_F1	240.35	76
63	MP_R1_F1	155.196	58
64	MP_R1_F1	200.794	73
65	MP_R1_F1	193.095	66
66	MP_R1_F1	196.409	64
67	MP_R1_F1	88.569	27
68	MP_R1_F1	178.066	49
69	MP_R1_F1	282.35	93
70	MP_R1_F1	62.77	18
71	MP_R1_F1	133.054	43
72	MP_R1_F1	90.184	24
73	MP_R1_F1	104.811	27
74	MP_R1_F1	69.841	21
75	MP_R1_F1	269.966	114
76	MP_R1_F1	163.48	43
77	MP_R1_F1	77.799	26
78	MP_R1_F1	201.782	52
79	MP_R1_F1	35.698	14
80	MP_R1_F1	117.397	37
81	MP_R1_F1	193.38	41
82	MP_R1_F1	349.747	88
83	MP_R1_F1	175.823	42
84	MP_R1_F1	96.426	38
85	MP_R1_F1	105.154	34
86	MP_R1_F1	98.569	29
87	MP_R1_F1	54.284	10
88	MP_R1_F1	138.368	36
89	MP_R1_F1	184.167	55
90	MP_R1_F1	134.368	37
91	MP_R1_F1	108.225	35
92	MP_R1_F1	101.983	34
93	MP_R1_F1	47.113	14
94	MP_R1_F1	53.456	20
95	MP_R1_F1	241.622	68
96	MP_R1_F1	73.497	26
97	MP_R1_F1	206.593	50
98	MP_R1_F1	168.368	50
99	MP_R1_F1	58.527	18
100	MP_R1_F1	56.87	15
101	MP_R1_F1	146.024	45
102	MP_R1_F1	57.841	19
103	MP_R1_F1	109.841	34
104	MP_R1_F1	42.284	9
105	MP_R1_F1	192.853	70
106	MP_R1_F1	220.309	68
107	MP_R1_F1	52.87	15
108	MP_R1_F1	89.255	20
109	MP_R1_F1	80.083	25
110	MP_R1_F1	202.208	65
111	MP_R1_F1	213.966	65
112	MP_R1_F1	102.225	37
113	MP_R1_F1	48.527	18
114	MP_R1_F1	145.539	49
115	MP_R1_F1	280.936	85
116	MP_R1_F1	107.397	40
117	MP_R1_F1	238.593	80
118	MP_R1_F1	107.74	38
119	MP_R1_F1	72.77	23
120	MP_R1_F1	130.024	35
121	MP_R1_F1	243.321	72
122	MP_R1_F1	168.61	54
123	MP_R1_F1	204.995	48
124	MP_R1_F1	156.853	55
125	MP_R1_F1	134.995	47
126	MP_R1_F1	121.196	28
127	MP_R1_F1	113.882	31
128	MP_R1_F1	50.527	18
129	MP_R1_F1	88.912	24
130	MP_R1_F1	154.711	47
131	MP_R1_F1	181.823	47
132	MP_R1_F1	143.882	26
133	MP_R1_F1	85.497	24
134	MP_R1_F1	183.681	51
135	MP_R1_F1	257.078	74
136	MP_R1_F1	107.983	43
137	MP_R1_F1	105.64	30
138	MP_R1_F1	288.635	71
139	MP_R1_F1	125.539	36
140	MP_R1_F1	101.983	26
141	MP_R1_F1	94.125	29
142	MP_R1_F1	167.095	48
143	MP_R1_F1	144.752	46
144	MP_R1_F1	178.167	50
145	MP_R1_F1	34.627	10
146	MP_R1_F1	137.882	48
147	MP_R1_F1	141.196	43
148	MP_R1_F1	147.681	44
149	MP_R1_F1	55.113	20
150	MP_R1_F1	318.877	88
151	MP_R1_F1	158.894	47
152	MP_R1_F1	131.539	49
153	MP_R1_F1	76.426	26
154	MP_R1_F1	90.569	26
155	MP_R1_F1	134.368	48
156	MP_R1_F1	77.598	18
157	MP_R1_F1	133.782	38
158	MP_R1_F1	131.64	27
159	MP_R1_F1	162.894	44
160	MP_R1_F1	71.355	29
161	MP_R1_F1	161.196	42
162	MP_R1_F1	129.054	45
163	MP_R1_F1	81.154	23
164	MP_R1_F1	113.054	39
165	MP_R1_F1	296.877	72
166	MP_R1_F1	275.907	76
167	MP_R1_F1	93.012	19
168	MP_R1_F1	226.995	68
169	MP_R1_F1	82.569	25
170	MP_R1_F1	110.569	39
171	MP_R1_F1	266.492	81
172	MP_R1_F1	116.125	35
173	MP_R1_F1	48.77	14
174	MP_R1_F1	130.125	48
175	MP_R1_F1	252.936	71
176	MP_R1_F1	46.042	17
177	MP_R1_F1	102.468	35
178	MP_R1_F1	444.475	136
179	MP_R1_F1	123.296	35
180	MP_R1_F1	132.953	36
181	MP_R1_F1	296.652	86
182	MP_R1_F1	201.095	56
183	MP_R1_F1	256.451	88
184	MP_R1_F1	185.238	44
185	MP_R1_F1	172.024	54
186	MP_R1_F1	218.853	51
187	MP_R1_F1	72.426	18
188	MP_R1_F1	217.539	57
189	MP_R1_F1	217.037	59
190	MP_R1_F1	73.698	23
191	MP_R1_F1	148.953	43
192	MP_R1_F1	124.083	43
193	MP_R1_F1	182.167	53
194	MP_R1_F1	162.309	49
195	MP_R1_F1	61.941	21
196	MP_R1_F1	203.439	48
197	MP_R1_F1	183.865	41
198	MP_R1_F1	87.154	24
199	MP_R1_F1	190.066	61
200	MP_R1_F1	65.355	22
201	MP_R1_F1	95.64	29
202	MP_R1_F1	263.563	91
203	MP_R1_F1	58.77	21
204	MP_R1_F1	36.142	12
205	MP_R1_F1	203.238	71
206	MP_R1_F1	168.912	46
207	MP_R1_F1	211.681	63
208	MP_R1_F1	272.836	80
209	MP_R1_F1	192.267	74
210	MP_R1_F1	247.522	69
211	MP_R1_F1	80.326	31
212	MP_R1_F1	244.794	88
213	MP_R1_F1	88.669	29
214	MP_R1_F1	109.054	37
215	MP_R1_F1	92.669	31
216	MP_R1_F1	189.823	62
217	MP_R1_F1	124.811	34
218	MP_R1_F1	70.87	11
219	MP_R1_F1	90.326	36
220	MP_R1_F1	45.698	15
221	MP_R1_F1	115.054	27
222	MP_R1_F1	359.706	118
223	MP_R1_F1	128.752	40
224	MP_R1_F1	95.012	24
225	MP_R1_F1	162.61	52
226	MP_R1_F1	44.284	13
227	MP_R1_F1	113.64	36
228	MP_R1_F1	155.539	34
229	MP_R1_F1	191.238	63
230	MP_R1_F1	205.238	57
231	MP_R1_F1	88.426	24
232	MP_R1_F1	209.38	64
233	MP_R1_F1	35.799	8
234	MP_R1_F1	124.225	29
235	MP_R1_F1	51.355	16
236	MP_R1_F1	222.693	53
237	MP_R1_F1	117.782	38
238	MP_R1_F1	77.841	26
239	MP_R1_F1	238.794	62
240	MP_R1_F1	138.368	49
241	MP_R1_F1	209.078	67
242	MP_R1_F1	183.823	55
243	MP_R1_F1	50.385	11
244	MP_R1_F1	124.125	33
245	MP_R1_F1	75.355	23
246	MP_R1_F1	128.811	46
247	MP_R1_F1	44.971	11
248	MP_R1_F1	185.238	50
249	MP_R1_F1	133.924	39
250	MP_R1_F1	124.024	32
251	MP_R1_F1	118.468	37
252	MP_R1_F1	44.527	14
253	MP_R1_F1	129.296	32
254	MP_R1_F1	207.966	49
255	MP_R1_F1	262.108	92
256	MP_R1_F1	75.841	17
257	MP_R1_F1	185.037	51
258	MP_R1_F1	84.669	30
259	MP_R1_F1	104.225	36
260	MP_R1_F1	278.208	99
261	MP_R1_F1	93.497	33
262	MP_R1_F1	104.61	35
263	MP_R1_F1	111.054	29
264	MP_R1_F1	287.179	94
265	MP_R1_F1	123.681	43
266	MP_R1_F1	129.497	53
267	MP_R1_F1	52.77	16
268	MP_R1_F1	221.522	58
269	MP_R1_F1	205.823	49
270	MP_R1_F1	36.385	8
271	MP_R1_F1	53.841	14
272	MP_R1_F1	230.451	67
273	MP_R1_F1	309.563	87
274	MP_R1_F1	110.953	23
275	MP_R1_F1	136.711	40
276	MP_R1_F1	65.355	19
277	MP_R1_F1	173.966	53
278	MP_R1_F1	190.409	37
279	MP_R1_F1	141.539	40
280	MP_R1_F1	163.095	48
281	MP_R1_F1	213.037	64
282	MP_R1_F1	178.309	55
283	MP_R1_F1	98.326	29
284	MP_R1_F1	250.551	73
285	MP_R1_F1	155.196	48
286	MP_R1_F1	51.941	15
287	MP_R1_F1	48.87	9
288	MP_R1_F1	33.213	13
289	MP_R1_F1	138.368	26
290	MP_R1_F1	157.581	57
291	MP_R1_F1	88.669	30
292	MP_R1_F1	296.208	63
293	MP_R1_F1	129.397	27
294	MP_R1_F1	121.539	42
295	MP_R1_F1	30.971	10
296	MP_R1_F1	152.024	55
297	MP_R1_F1	263.765	75
298	MP_R1_F1	259.48	61
299	MP_R1_F1	72.426	16
300	MP_R1_F1	154.853	41
301	MP_R1_F1	227.095	82
302	MP_R1_F1	272.794	64
303	MP_R1_F1	160.894	58
304	MP_R1_F1	289.823	98
305	MP_R1_F1	144.024	46
306	MP_R1_F1	213.765	68
307	MP_R1_F1	169.966	55
308	MP_R1_F1	167.196	55
309	MP_R1_F1	47.698	13
310	MP_R1_F1	150.711	58
311	MP_R1_F1	277.279	81
312	MP_R1_F1	216.451	46
313	MP_R1_F1	112.669	40
314	MP_R1_F1	128.024	40
315	MP_R1_F1	140.225	42
316	MP_R1_F1	216.995	57
317	MP_R1_F1	122.811	51
318	MP_R1_F1	104.468	29
319	MP_R1_F1	243.522	70
320	MP_R1_F1	191.037	65
321	MP_R1_F1	96.669	35
322	MP_R1_F1	268.836	72
323	MP_R1_F1	200.208	71
324	MP_R1_F1	119.64	40
325	MP_R1_F1	98.468	36
326	MP_R1_F1	86.569	24
327	MP_R1_F1	59.355	24
328	MP_R1_F1	153.681	37
329	MP_R1_F1	112.125	35
330	MP_R1_F1	126.368	43
331	MP_R1_F1	218.208	67
332	MP_R1_F1	125.296	29
333	MP_R1_F1	132.51	33
334	MP_R1_F1	187.823	44
335	MP_R1_F1	130.468	45
336	MP_R1_F1	112.711	40
337	MP_R1_F1	38.485	4
338	MP_R1_F1	147.196	38
339	MP_R1_F1	72.912	26
340	MP_R1_F1	107.74	39
341	MP_R1_F1	315.907	90
342	MP_R1_F1	166.61	40
343	MP_R1_F1	158.267	44
344	MP_R1_F1	108.912	17
345	MP_R1_F1	40.527	14
346	MP_R1_F1	257.179	67
347	MP_R1_F1	170.267	51
348	MP_R1_F1	135.054	43
349	MP_R1_F1	85.012	30
350	MP_R1_F1	164.569	52
351	MP_R1_F1	83.154	24
352	MP_R1_F1	114.811	33
353	MP_R1_F1	91.012	31
354	MP_R1_F1	104.811	31
355	MP_R1_F1	112.426	35
356	MP_R1_F1	84.326	28
357	MP_R1_F1	174.409	39
358	MP_R1_F1	61.841	19
359	MP_R1_F1	48.971	7
360	MP_R1_F1	115.154	30
361	MP_R1_F1	49.355	18
362	MP_R1_F1	60.77	17
363	MP_R1_F1	47.355	17
364	MP_R1_F1	141.882	48
365	MP_R1_F1	175.823	63
366	MP_R1_F1	50.527	13
367	MP_R1_F1	40.87	12
368	MP_R1_F1	137.539	35
369	MP_R1_F1	210.894	48
370	MP_R1_F1	143.539	34
371	MP_R1_F1	114.912	21
372	MP_R1_F1	146.853	51
373	MP_R1_F1	166.125	26
374	MP_R1_F1	121.983	30
375	MP_R1_F1	231.765	70
376	MP_R1_F1	174.894	57
377	MP_R1_F1	118.811	48
378	MP_R1_F1	291.12	80
379	MP_R1_F1	84.77	32
380	MP_R1_F1	130.368	41
381	MP_R1_F1	205.966	46
382	MP_R1_F1	186.652	48
383	MP_R1_F1	44.385	15
384	MP_R1_F1	137.054	33
385	MP_R1_F1	270.291	99
386	MP_R1_F1	176.995	58
387	MP_R1_F1	228.451	56
388	MP_R1_F1	112.024	33
389	MP_R1_F1	224.794	54
390	MP_R1_F1	48.042	19
391	MP_R1_F1	240.208	58
392	MP_R1_F1	213.48	67
393	MP_R1_F1	226.693	47
394	MP_R1_F1	61.556	22
395	MP_R1_F1	133.054	38
396	MP_R1_F1	148.811	41
397	MP_R1_F1	100.468	28
398	MP_R1_F1	213.196	51
399	MP_R1_F1	123.782	43
400	MP_R1_F1	137.397	28
401	MP_R1_F1	193.581	63
402	MP_R1_F1	258.836	72
403	MP_R1_F1	282.978	80
404	MP_R1_F1	194.225	57
405	MP_R1_F1	142.083	43
406	MP_R1_F1	323.421	77
407	MP_R1_F1	32.042	11
408	MP_R1_F1	50.184	17
409	MP_R1_F1	273.664	95
410	MP_R1_F1	339.948	86
411	MP_R1_F1	73.598	24
412	MP_R1_F1	198.51	56
413	MP_R1_F1	109.983	34
414	MP_R1_F1	79.497	31
415	MP_R1_F1	192.309	52
416	MP_R1_F1	37.556	10
417	MP_R1_F1	243.823	63
418	MP_R1_F1	244.392	73
419	MP_R1_F1	118.225	34
420	MP_R1_F1	210.066	49
421	MP_R1_F1	126.711	29
422	MP_R1_F1	276.35	67
423	MP_R1_F1	127.64	37
424	MP_R1_F1	201.48	61
425	MP_R1_F1	156.61	50
426	MP_R1_F1	92.912	29
427	MP_R1_F1	271.137	79
428	MP_R1_F1	174.853	56
429	MP_R1_F1	144.167	45
430	MP_R1_F1	209.966	55
431	MP_R1_F1	191.137	59
432	MP_R1_F1	239.966	62
433	MP_R1_F1	100.326	25
434	MP_R1_F1	300.836	63
435	MP_R1_F1	283.38	68
436	MP_R1_F1	115.983	26
437	MP_R1_F1	51.799	9
438	MP_R1_F1	144.368	42
439	MP_R1_F1	119.64	35
440	MP_R1_F1	110.468	27
441	MP_R1_F1	62.284	13
442	MP_R1_F1	62.77	22
443	MP_R1_F1	108.468	33
444	MP_R1_F1	198.894	49
445	MP_R1_F1	99.983	26
446	MP_R1_F1	207.581	51
447	MP_R1_F1	149.983	28
448	MP_R1_F1	48.042	10
449	MP_R1_F1	75.841	21
450	MP_R1_F1	200.711	39
451	MP_R1_F1	38.385	14
452	MP_R1_F1	109.397	35
453	MP_R1_F1	133.439	45
454	MP_R1_F1	181.38	55
455	MP_R1_F1	133.882	38
456	MP_R1_F1	140.711	38
457	MP_R1_F1	91.64	30
458	MP_R1_F1	309.078	75
459	MP_R1_F1	114.912	20
460	MP_R1_F1	59.355	18
461	MP_R1_F1	50.87	10
462	MP_R1_F1	308.635	74
463	MP_R1_F1	287.765	88
464	MP_R1_F1	115.338	39
465	MP_R1_F1	47.213	17
466	MP_R1_F1	47.213	9
467	MP_R1_F1	312.049	75
468	MP_R1_F1	261.806	86
469	MP_R1_F1	204.167	64
470	MP_R1_F1	210.208	53
471	MP_R1_F1	41.456	15
472	MP_R1_F1	188.794	64
473	MP_R1_F1	143.238	43
474	MP_R1_F1	114.569	38
475	MP_R1_F1	177.823	56
476	MP_R1_F1	95.397	25
477	MP_R1_F1	64.426	19
478	MP_R1_F1	58.527	19
479	MP_R1_F1	283.22	90
480	MP_R1_F1	105.054	40
481	MP_R1_F1	42.042	18
482	MP_R1_F1	159.581	47
483	MP_R1_F1	226.208	64
484	MP_R1_F1	55.456	23
485	MP_R1_F1	229.48	78
486	MP_R1_F1	174.167	48
487	MP_R1_F1	65.012	21
488	MP_R1_F1	108.569	27
489	MP_R1_F1	250.108	74
490	MP_R1_F1	101.64	36
491	MP_R1_F1	121.983	31
492	MP_R1_F1	138.953	40
493	MP_R1_F1	225.723	54
494	MP_R1_F1	138.468	25
495	MP_R1_F1	156.267	46
496	MP_R1_F1	261.48	62
497	MP_R1_F1	170.953	32
498	MP_R1_F1	229.723	39
499	MP_R1_F1	253.38	86
500	MP_R1_F1	95.74	25
501	MP_R1_F1	137.196	53
502	MP_R1_F1	183.338	55
503	MP_R1_F1	145.296	48
504	MP_R1_F1	80.426	19
505	MP_R1_F1	40.385	11
506	MP_R1_F1	157.882	55
507	MP_R1_F1	128.61	50
508	MP_R1_F1	78.426	16
509	MP_R1_F1	46.87	13
510	MP_R1_F1	125.983	51
511	MP_R1_F1	56.527	21
512	MP_R1_F1	33.556	13
513	MP_R1_F1	31.799	11
514	MP_R1_F1	49.355	15
515	MP_R1_F1	248.108	62
516	MP_R1_F1	109.882	36
517	MP_R1_F1	228.108	74
518	MP_R1_F1	276.25	79
519	MP_R1_F1	36.627	13
520	MP_R1_F1	115.882	30
521	MP_R1_F1	38.627	15
522	MP_R1_F1	186.267	52
523	MP_R1_F1	112.569	31
524	MP_R1_F1	51.113	18
525	MP_R1_F1	256.551	67
526	MP_R1_F1	99.882	35
527	MP_R1_F1	141.581	45
528	MP_R1_F1	250.836	56
529	MP_R1_F1	141.439	51
530	MP_R1_F1	150.853	43
531	MP_R1_F1	63.598	16
532	MP_R1_F1	189.037	51
533	MP_R1_F1	213.38	58
534	MP_R1_F1	42.627	9
535	MP_R1_F1	99.255	33
536	MP_R1_F1	57.456	16
537	MP_R1_F1	126.953	38
538	MP_R1_F1	211.865	67
539	MP_R1_F1	83.983	28
540	MP_R1_F1	155.539	45
541	MP_R1_F1	94.426	25
542	MP_R1_F1	95.74	28
543	MP_R1_F1	200.309	48
544	MP_R1_F1	35.799	10
545	MP_R1_F1	158.853	43
546	MP_R1_F1	101.397	30
547	MP_R1_F1	69.841	21
548	MP_R1_F1	60.669	17
549	MP_R1_F1	211.924	74
550	MP_R1_F1	86.083	25
551	MP_R1_F1	190.551	52
552	MP_R1_F1	56.627	10
553	MP_R1_F1	63.355	17
554	MP_R1_F1	188.024	64
555	MP_R1_F1	122.225	30
556	MP_R1_F1	120.711	43
557	MP_R1_F1	205.924	62
558	MP_R1_F1	318.978	80
559	MP_R1_F1	109.255	38
560	MP_R1_F1	86.77	23
561	MP_R1_F1	288.894	83
562	MP_R1_F1	241.179	53
563	MP_R1_F1	174.669	47
564	MP_R1_F1	55.698	11
565	MP_R1_F1	179.924	51
566	MP_R1_F1	77.497	20
567	MP_R1_F1	43.799	18
568	MP_R1_F1	164.953	42
569	MP_R1_F1	43.213	17
570	MP_R1_F1	130.953	38
571	MP_R1_F1	108.125	36
572	MP_R1_F1	92.669	25
573	MP_R1_F1	57.355	19
574	MP_R1_F1	280.191	87
575	MP_R1_F1	294.392	96
576	MP_R1_F1	34.627	10
577	MP_R1_F1	131.782	37
578	MP_R1_F1	197.48	63
579	MP_R1_F1	119.882	34
580	MP_R1_F1	260.551	89
581	MP_R1_F1	90.326	12
582	MP_R1_F1	132.184	41
583	MP_R1_F1	111.296	37
584	MP_R1_F1	234.593	77
585	MP_R1_F1	206.593	65
586	MP_R1_F1	143.681	45
587	MP_R1_F1	171.681	60
588	MP_R1_F1	209.581	39
589	MP_R1_F1	287.22	82
590	MP_R1_F1	69.355	19
591	MP_R1_F1	32.385	12
592	MP_R1_F1	259.948	82
593	MP_R1_F1	187.38	54
594	MP_R1_F1	206.309	52
595	MP_R1_F1	277.421	54
596	MP_R1_F1	180.409	51
597	MP_R1_F1	238.752	40
598	MP_R1_F1	180.167	40
599	MP_R1_F1	47.456	18
600	MP_R1_F1	70.083	24
601	MP_R1_F1	158.711	50
602	MP_R1_F1	98.326	27
603	MP_R1_F1	166.125	51
604	MP_R1_F1	100.912	28
605	MP_R1_F1	174.51	41
606	MP_R1_F1	116.468	32
607	MP_R1_F1	178.51	70
608	MP_R1_F1	93.841	28
609	MP_R1_F1	99.497	27
610	MP_R1_F1	87.74	26
611	MP_R1_F1	109.983	37
612	MP_R1_F1	143.095	44
613	MP_R1_F1	68.184	26
614	MP_R1_F1	215.806	56
615	MP_R1_F1	362.777	88
616	MP_R1_F1	265.966	71
617	MP_R1_F1	101.882	24
618	MP_R1_F1	154.61	31
619	MP_R1_F1	65.598	24
620	MP_R1_F1	121.054	39
621	MP_R1_F1	72.426	24
622	MP_R1_F1	122.953	40
623	MP_R1_F1	114.811	41
624	MP_R1_F1	163.397	40
625	MP_R1_F1	230.368	54
626	MP_R1_F1	250.836	97
627	MP_R1_F1	149.095	50
628	MP_R1_F1	241.966	78
629	MP_R1_F1	39.456	15
630	MP_R1_F1	219.279	55
631	MP_R1_F1	236.409	68
632	MP_R1_F1	222.167	53
633	MP_R1_F1	168.51	55
634	MP_R1_F1	173.64	55
635	MP_R1_F1	189.137	52
636	MP_R1_F1	78.426	30
637	MP_R1_F1	83.74	25
638	MP_R1_F1	137.681	45
639	MP_R1_F1	146.125	50
640	MP_R1_F1	315.505	100
641	MP_R1_F1	141.196	45
642	MP_R1_F1	177.296	26
643	MP_R1_F1	104.912	32
644	MP_R1_F1	168.51	60
645	MP_R1_F1	193.48	40
646	MP_R1_F1	52.87	20
647	MP_R1_F1	82.326	25
648	MP_R1_F1	49.113	17
649	MP_R1_F1	185.095	49
650	MP_R1_F1	103.841	34
651	MP_R1_F1	156.853	50
652	MP_R1_F1	61.113	19
653	MP_R1_F1	60.627	27
654	MP_R1_F1	256.693	70
655	MP_R1_F1	241.279	60
656	MP_R1_F1	244.492	69
657	MP_R1_F1	182.309	55
658	MP_R1_F1	204.409	56
659	MP_R1_F1	130.225	30
660	MP_R1_F1	197.439	61
661	MP_R1_F1	186.267	57
662	MP_R1_F1	197.823	51
663	MP_R1_F1	121.154	40
664	MP_R1_F1	52.77	15
665	MP_R1_F1	67.255	24
666	MP_R1_F1	115.196	33
667	MP_R1_F1	294.735	92
668	MP_R1_F1	176.024	61
669	MP_R1_F1	30.042	11
670	MP_R1_F1	185.723	57
671	MP_R1_F1	41.698	13
672	MP_R1_F1	94.912	22
673	MP_R1_F1	134.953	37
674	MP_R1_F1	97.74	34
675	MP_R1_F1	130.711	45
676	MP_R1_F1	100.569	30
677	MP_R1_F1	44.87	15
678	MP_R1_F1	47.456	19
679	MP_R1_F1	112.61	31
680	MP_R1_F1	267.279	83
681	MP_R1_F1	178.51	48
682	MP_R1_F1	158.652	48
683	MP_R1_F1	138.024	41
684	MP_R1_F1	121.397	43
685	MP_R1_F1	154.51	45
686	MP_R1_F1	128.125	39
687	MP_R1_F1	141.439	41
688	MP_R1_F1	295.664	106
689	MP_R1_F1	93.196	32
690	MP_R1_F1	153.882	42
691	MP_R1_F1	174.167	53
692	MP_R1_F1	218.936	70
693	MP_R1_F1	86.912	27
694	MP_R1_F1	57.698	21
695	MP_R1_F1	71.941	16
696	MP_R1_F1	79.941	33
697	MP_R1_F1	119.497	30
698	MP_R1_F1	163.74	48
699	MP_R1_F1	304.35	109
700	MP_R1_F1	103.154	25
701	MP_R1_F1	241.421	72
702	MP_R1_F1	256.25	78
703	MP_R1_F1	110.468	39
704	MP_R1_F1	282.35	61
705	MP_R1_F1	60.87	17
706	MP_R1_F1	77.255	18
707	MP_R1_F1	35.213	14
708	MP_R1_F1	227.865	62
709	MP_R1_F1	54.184	18
710	MP_R1_F1	267.179	59
711	MP_R1_F1	71.113	15
712	MP_R1_F1	218.167	62
713	MP_R1_F1	133.196	45
714	MP_R1_F1	273.22	77
715	MP_R1_F1	167.296	44
716	MP_R1_F1	153.255	35
717	MP_R1_F1	142.368	33
718	MP_R1_F1	205.622	74
719	MP_R1_F1	93.397	33
720	MP_R1_F1	242.794	74
721	MP_R1_F1	91.64	27
722	MP_R1_F1	227.38	63
723	MP_R1_F1	194.853	60
724	MP_R1_F1	121.882	29
725	MP_R1_F1	199.723	38
726	MP_R1_F1	175.581	56
727	MP_R1_F1	80.426	27
728	MP_R1_F1	186.409	56
729	MP_R1_F1	164.61	62
730	MP_R1_F1	234.551	68
731	MP_R1_F1	41.799	9
732	MP_R1_F1	56.77	18
733	MP_R1_F1	222.794	48
734	MP_R1_F1	55.698	15
735	MP_R1_F1	154.853	46
736	MP_R1_F1	187.782	67
737	MP_R1_F1	143.196	48
738	MP_R1_F1	134.468	38
739	MP_R1_F1	185.338	54
740	MP_R1_F1	136.61	33
741	MP_R1_F1	53.456	14
742	MP_R1_F1	188.711	54
743	MP_R1_F1	258.392	69
744	MP_R1_F1	166.752	53
745	MP_R1_F1	238.652	63
746	MP_R1_F1	60.77	20
747	MP_R1_F1	116.267	36
748	MP_R1_F1	58.77	17
749	MP_R1_F1	36.87	13
750	MP_R1_F1	238.309	62
751	MP_R1_F1	170.953	54
752	MP_R1_F1	133.196	41
753	MP_R1_F1	130.569	41
754	MP_R1_F1	146.953	38
755	MP_R1_F1	179.439	66
756	MP_R1_F1	151.581	49
757	MP_R1_F1	37.799	9
758	MP_R1_F1	240.693	64
759	MP_R1_F1	163.338	46
760	MP_R1_F1	146.51	36
761	MP_R1_F1	117.882	42
762	MP_R1_F1	88.912	26
763	MP_R1_F1	48.284	18
764	MP_R1_F1	35.456	12
765	MP_R1_F1	270.978	82
766	MP_R1_F1	72.426	27
767	MP_R1_F1	136.61	39
768	MP_R1_F1	208.752	55
769	MP_R1_F1	122.711	32
770	MP_R1_F1	228.451	61
771	MP_R1_F1	92.527	30
772	MP_R1_F1	80.77	20
773	MP_R1_F1	298.35	74
774	MP_R1_F1	277.179	72
775	MP_R1_F1	314.777	96
776	MP_R1_F1	118.711	34
777	MP_R1_F1	164.267	53
778	MP_R1_F1	97.397	33
779	MP_R1_F1	246.693	72
780	MP_R1_F1	55.698	18
781	MP_R1_F1	356.09	98
782	MP_R1_F1	184.51	59
783	MP_R1_F1	159.338	44
784	MP_R1_F1	228.066	65
785	MP_R1_F1	143.196	46
786	MP_R1_F1	138.225	41
787	MP_R1_F1	289.463	74
788	MP_R1_F1	154.024	37
789	MP_R1_F1	290.936	67
790	MP_R1_F1	306.434	90
791	MP_R1_F1	142.61	41
792	MP_R1_F1	77.255	24
793	MP_R1_F1	98.326	26
794	MP_R1_F1	114.225	43
795	MP_R1_F1	89.255	26
796	MP_R1_F1	39.213	12
797	MP_R1_F1	33.799	12
798	MP_R1_F1	218.35	58
799	MP_R1_F1	212.652	52
800	MP_R1_F1	166.894	54
801	MP_R1_F1	86.083	24
802	MP_R1_F1	104.225	31
803	MP_R1_F1	198.752	55
804	MP_R1_F1	242.936	56
805	MP_R1_F1	88.569	28
806	MP_R1_F1	119.539	31
807	MP_R1_F1	57.355	18
808	MP_R1_F1	70.77	23
809	MP_R1_F1	229.421	74
810	MP_R1_F1	121.64	33
811	MP_R1_F1	67.598	28
812	MP_R1_F1	275.179	79
813	MP_R1_F1	210.752	49
814	MP_R1_F1	110.669	40
815	MP_R1_F1	174.61	54
816	MP_R1_F1	132.811	34
817	MP_R1_F1	49.355	16
818	MP_R1_F1	97.497	25
819	MP_R1_F1	175.782	42
820	MP_R1_F1	129.681	42
821	MP_R1_F1	300.735	94
822	MP_R1_F1	106.326	29
823	MP_R1_F1	145.095	50
824	MP_R1_F1	277.078	81
825	MP_R1_F1	273.907	81
826	MP_R1_F1	55.941	22
827	MP_R1_F1	267.581	92
828	MP_R1_F1	94.569	29
829	MP_R1_F1	220.35	64
830	MP_R1_F1	105.054	36
831	MP_R1_F1	55.698	13
832	MP_R1_F1	47.698	18
833	MP_R1_F1	262.392	71
834	MP_R1_F1	124.267	39
835	MP_R1_F1	93.74	27
836	MP_R1_F1	106.811	39
837	MP_R1_F1	138.125	48
838	MP_R1_F1	52.77	16
839	MP_R1_F1	96.125	32
840	MP_R1_F1	239.38	62
841	MP_R1_F1	107.154	27
842	MP_R1_F1	70.426	23
843	MP_R1_F1	258.978	76
844	MP_R1_F1	48.87	13
845	MP_R1_F1	48.385	11
846	MP_R1_F1	186.066	47
847	MP_R1_F1	198.309	53
848	MP_R1_F1	40.284	14
849	MP_R1_F1	165.581	58
850	MP_R1_F1	76.527	27
851	MP_R1_F1	33.799	13
852	MP_R1_F1	29.899	10
853	MP_R1_F1	234.108	43
854	MP_R1_F1	59.698	23
855	MP_R1_F1	354.617	110
856	MP_R1_F1	174.368	56
857	MP_R1_F1	235.765	70
858	MP_R1_F1	66.184	19
859	MP_R1_F1	71.355	16
860	MP_R1_F1	84.083	25
861	MP_R1_F1	249.563	66
862	MP_R1_F1	48.87	13
863	MP_R1_F1	144.368	49
864	MP_R1_F1	46.284	15
865	MP_R1_F1	178.409	43
866	MP_R1_F1	115.296	33
867	MP_R1_F1	63.941	22
868	MP_R1_F1	135.439	40
869	MP_R1_F1	56.042	14
870	MP_R1_F1	242.208	66
871	MP_R1_F1	316.877	105
872	MP_R1_F1	290.593	85
873	MP_R1_F1	62.083	19
874	MP_R1_F1	88.811	26
875	MP_R1_F1	158.61	58
876	MP_R1_F1	95.74	33
877	MP_R1_F1	125.882	34
878	MP_R1_F1	182.51	53
879	MP_R1_F1	232.652	75
880	MP_R1_F1	201.279	71
881	MP_R1_F1	61.012	18
882	MP_R1_F1	158.752	58
883	MP_R1_F1	272.693	89
884	MP_R1_F1	64.77	11
885	MP_R1_F1	150.711	42
886	MP_R1_F1	262.676	75
887	MP_R1_F1	118.225	25
888	MP_R1_F1	106.468	33
889	MP_R1_F1	175.054	60
890	MP_R1_F1	148.51	56
891	MP_R1_F1	46.142	9
892	MP_R1_F1	79.598	25
893	MP_R1_F1	97.64	32
894	MP_R1_F1	147.924	45
895	MP_R1_F1	95.983	38
896	MP_R1_F1	326.25	94
897	MP_R1_F1	283.664	75
898	MP_R1_F1	304.492	74
899	MP_R1_F1	46.284	17
900	MP_R1_F1	35.456	14
901	MP_R1_F1	91.397	26
902	MP_R1_F1	233.463	76
903	MP_R1_F1	112.326	36
904	MP_R1_F1	171.723	63
905	MP_R1_F1	293.179	109
906	MP_R1_F1	237.137	87
907	MP_R1_F1	165.238	56
908	MP_R1_F1	207.38	61
909	MP_R1_F1	213.439	86
910	MP_R1_F1	102.225	38
911	MP_R1_F1	103.64	36
912	MP_R1_F1	148.61	50
913	MP_R1_F1	299.806	96
914	MP_R1_F1	98.083	31
915	MP_R1_F1	156.894	53
916	MP_R1_F1	102.711	36
917	MP_R1_F1	62.77	18
918	MP_R1_F1	285.078	70
919	MP_R1_F1	112.811	22
920	MP_R1_F1	212.894	68
921	MP_R1_F1	86.426	18
922	MP_R1_F1	157.095	46
923	MP_R1_F1	260.936	78
924	MP_R1_F1	80.326	31
925	MP_R1_F1	80.77	21
926	MP_R1_F1	155.397	43
927	MP_R1_F1	257.664	81
928	MP_R1_F1	34.971	13
929	MP_R1_F1	47.456	12
930	MP_R1_F1	295.22	78
931	MP_R1_F1	115.397	39
932	MP_R1_F1	281.22	91
933	MP_R1_F1	127.154	46
934	MP_R1_F1	205.622	59
935	MP_R1_F1	114.953	44
936	MP_R1_F1	154.125	32
937	MP_R1_F1	129.64	46
938	MP_R1_F1	59.598	17
939	MP_R1_F1	56.284	23
940	MP_R1_F1	147.397	46
941	MP_R1_F1	168.652	44
942	MP_R1_F1	148.125	39
943	MP_R1_F1	83.841	27
944	MP_R1_F1	44.728	20
945	MP_R1_F1	181.681	58
946	MP_R1_F1	46.87	14
947	MP_R1_F1	221.865	70
948	MP_R1_F1	30.728	8
949	MP_R1_F1	121.841	27
950	MP_R1_F1	109.841	31
951	MP_R1_F1	146.995	36
952	MP_R1_F1	127.054	26
953	MP_R1_F1	119.497	37
954	MP_R1_F1	223.037	64
955	MP_R1_F1	141.924	50
956	MP_R1_F1	246.794	74
957	MP_R1_F1	142.953	48
958	MP_R1_F1	124.024	41
959	MP_R1_F1	75.255	26
960	MP_R1_F1	100.569	28
961	MP_R1_F1	68.527	23
962	MP_R1_F1	182.853	56
963	MP_R1_F1	174.167	59
964	MP_R1_F1	105.012	32
965	MP_R1_F1	277.078	74
966	MP_R1_F1	171.338	61
967	MP_R1_F1	41.698	15
968	MP_R1_F1	32.385	10
969	MP_R1_F1	166.167	46
970	MP_R1_F1	184.652	58
971	MP_R1_F1	194.451	56
972	MP_R1_F1	157.539	44
973	MP_R1_F1	133.255	37
974	MP_R1_F1	92.569	32
975	MP_R1_F1	141.095	47
976	MP_R1_F1	88.326	32
977	MP_R1_F1	213.095	44
978	MP_R1_F1	40.385	12
979	MP_R1_F1	145.539	44
980	MP_R1_F1	168.652	58
981	MP_R1_F1	35.456	11
982	MP_R1_F1	195.924	63
983	MP_R1_F1	159.924	54
984	MP_R1_F1	79.598	26
985	MP_R1_F1	58.77	18
986	MP_R1_F1	239.137	73
987	MP_R1_F1	151.782	43
988	MP_R1_F1	85.497	20
989	MP_R1_F1	129.095	37
990	MP_R1_F1	131.255	29
991	MP_R1_F1	159.338	45
992	MP_R1_F1	89.255	27
993	MP_R1_F1	74.083	20
994	MP_R1_F1	57.698	19
995	MP_R1_F1	156.752	46
996	MP_R1_F1	54.042	14
997	MP_R1_F1	127.882	42
998	MP_R1_F1	311.907	67
999	MP_R1_F1	40.527	12
1000	MP_R1_F1	65.355	16
1001	MP_R1_F1	84.083	27
1002	MP_R1_F1	196.066	41
1003	MP_R1_F1	121.983	28
1004	MP_R1_F1	63.941	17
1005	MP_R1_F1	241.078	71
1006	MP_R1_F1	63.456	28
1007	MP_R1_F1	190.309	52
1008	MP_R1_F1	64.042	22
1009	MP_R1_F1	142.267	49
1010	MP_R1_F1	171.924	59
1011	MP_R1_F1	205.924	53
1012	MP_R1_F1	95.598	16
1013	MP_R1_F1	370.735	102
1014	MP_R1_F1	54.284	13
1015	MP_R1_F1	201.966	65
1016	MP_R1_F1	122.267	47
1017	MP_R1_F1	94.083	25
1018	MP_R1_F1	220.794	75
1019	MP_R1_F1	155.196	51
1020	MP_R1_F1	64.184	16
1021	MP_R1_F1	142.125	36
1022	MP_R1_F1	49.355	18
1023	MP_R1_F1	204.995	61
1024	MP_R1_F1	61.012	16
1025	MP_R1_F1	74.184	17
1026	MP_R1_F1	398.274	120
1027	MP_R1_F1	284.108	80
1028	MP_R1_F1	280.007	76
1029	MP_R1_F1	152.024	40
1030	MP_R1_F1	178.652	53
1031	MP_R1_F1	48.77	16
1032	MP_R1_F1	95.255	31
1033	MP_R1_F1	130.61	42
1034	MP_R1_F1	29.213	11
1035	MP_R1_F1	90.426	23
1036	MP_R1_F1	205.037	70
1037	MP_R1_F1	70.77	21
1038	MP_R1_F1	171.095	45
1039	MP_R1_F1	80.669	25
1040	MP_R1_F1	142.024	51
1041	MP_R1_F1	34.042	10
1042	MP_R1_F1	83.255	28
1043	MP_R1_F1	106.811	36
1044	MP_R1_F1	54.284	14
1045	MP_R1_F1	230.451	58
1046	MP_R1_F1	240.593	80
1047	MP_R1_F1	45.213	18
1048	MP_R1_F1	116.953	31
1049	MP_R1_F1	37.799	10
1050	MP_R1_F1	44.485	15
1051	MP_R1_F1	257.806	87
1052	MP_R1_F1	299.647	94
1053	MP_R1_F1	267.078	90
1054	MP_R1_F1	124.326	27
1055	MP_R1_F1	268.978	81
1056	MP_R1_F1	155.924	45
1057	MP_R1_F1	142.853	37
1058	MP_R1_F1	259.078	84
1059	MP_R1_F1	228.35	77
1060	MP_R1_F1	44.385	8
1061	MP_R1_F1	30.627	12
1062	MP_R1_F1	317.948	102
1063	MP_R1_F1	189.823	49
1064	MP_R1_F1	30.971	8
1065	MP_R1_F1	44.485	20
1066	MP_R1_F1	44.485	20
1	MP_R1_F2	46.485	19
2	MP_R1_F2	101.397	31
3	MP_R1_F2	231.723	62
4	MP_R1_F2	118.77	23
5	MP_R1_F2	116.811	34
6	MP_R1_F2	135.782	29
7	MP_R1_F2	34.728	5
8	MP_R1_F2	47.456	11
9	MP_R1_F2	30.385	12
10	MP_R1_F2	68.083	23
11	MP_R1_F2	147.882	35
12	MP_R1_F2	193.48	50
13	MP_R1_F2	141.154	34
14	MP_R1_F2	106.77	22
15	MP_R1_F2	65.012	24
16	MP_R1_F2	53.213	10
17	MP_R1_F2	100.468	30
18	MP_R1_F2	207.037	52
19	MP_R1_F2	163.095	44
20	MP_R1_F2	231.865	68
21	MP_R1_F2	94.426	30
22	MP_R1_F2	95.64	30
23	MP_R1_F2	145.439	47
24	MP_R1_F2	317.12	105
25	MP_R1_F2	204.309	51
26	MP_R1_F2	144.853	42
27	MP_R1_F2	240.451	81
28	MP_R1_F2	179.581	39
29	MP_R1_F2	47.113	17
30	MP_R1_F2	172.51	41
31	MP_R1_F2	92.083	18
32	MP_R1_F2	55.698	23
33	MP_R1_F2	174.551	45
34	MP_R1_F2	101.941	20
35	MP_R1_F2	46.042	13
36	MP_R1_F2	50.87	12
37	MP_R1_F2	262.735	79
38	MP_R1_F2	261.765	61
39	MP_R1_F2	57.113	15
40	MP_R1_F2	36.971	7
41	MP_R1_F2	40.042	11
42	MP_R1_F2	90.468	29
43	MP_R1_F2	113.296	36
44	MP_R1_F2	100.326	34
45	MP_R1_F2	75.355	20
46	MP_R1_F2	259.179	79
47	MP_R1_F2	259.622	84
48	MP_R1_F2	139.439	50
49	MP_R1_F2	49.456	12
50	MP_R1_F2	175.924	36
51	MP_R1_F2	67.012	16
52	MP_R1_F2	297.12	75
53	MP_R1_F2	184.267	55
54	MP_R1_F2	319.806	93
55	MP_R1_F2	235.037	63
56	MP_R1_F2	166.167	47
57	MP_R1_F2	125.397	40
58	MP_R1_F2	60.184	23
59	MP_R1_F2	126.811	48
60	MP_R1_F2	81.841	26
61	MP_R1_F2	326.777	96
62	MP_R1_F2	99.497	27
63	MP_R1_F2	176.853	47
64	MP_R1_F2	96.426	31
65	MP_R1_F2	65.355	15
66	MP_R1_F2	53.698	18
67	MP_R1_F2	116.225	37
68	MP_R1_F2	34.87	12
69	MP_R1_F2	49.113	11
70	MP_R1_F2	96.426	34
71	MP_R1_F2	66.284	16
72	MP_R1_F2	255.664	77
73	MP_R1_F2	95.497	29
74	MP_R1_F2	265.037	78
75	MP_R1_F2	39.799	7
76	MP_R1_F2	98.669	29
77	MP_R1_F2	112.569	31
78	MP_R1_F2	217.723	71
79	MP_R1_F2	54.284	17
80	MP_R1_F2	101.154	30
81	MP_R1_F2	200.652	58
82	MP_R1_F2	90.669	29
83	MP_R1_F2	237.238	83
84	MP_R1_F2	97.74	35
85	MP_R1_F2	54.527	17
86	MP_R1_F2	54.284	15
87	MP_R1_F2	148.995	40
88	MP_R1_F2	209.238	51
89	MP_R1_F2	224.208	80
90	MP_R1_F2	72.184	14
91	MP_R1_F2	56.87	20
92	MP_R1_F2	61.598	19
93	MP_R1_F2	305.622	83
94	MP_R1_F2	209.622	65
95	MP_R1_F2	73.598	17
96	MP_R1_F2	190.693	59
97	MP_R1_F2	106.811	27
98	MP_R1_F2	165.238	49
99	MP_R1_F2	388.233	78
100	MP_R1_F2	301.806	101
101	MP_R1_F2	54.87	13
102	MP_R1_F2	178.853	31
103	MP_R1_F2	343.747	101
104	MP_R1_F2	106.669	41
105	MP_R1_F2	66.77	18
106	MP_R1_F2	277.723	72
107	MP_R1_F2	242.108	65
108	MP_R1_F2	143.782	45
109	MP_R1_F2	57.941	20
110	MP_R1_F2	110.326	41
111	MP_R1_F2	40.042	12
112	MP_R1_F2	249.421	68
113	MP_R1_F2	58.627	13
114	MP_R1_F2	46.284	12
115	MP_R1_F2	118.368	37
116	MP_R1_F2	55.012	16
117	MP_R1_F2	237.865	67
118	MP_R1_F2	73.012	18
119	MP_R1_F2	118.225	35
120	MP_R1_F2	196.007	50
121	MP_R1_F2	226.392	79
122	MP_R1_F2	228.409	50
123	MP_R1_F2	331.304	124
124	MP_R1_F2	107.255	31
125	MP_R1_F2	176.894	55
126	MP_R1_F2	148.811	39
127	MP_R1_F2	57.941	22
128	MP_R1_F2	183.054	57
129	MP_R1_F2	76.385	31
130	MP_R1_F2	209.137	64
131	MP_R1_F2	261.421	73
132	MP_R1_F2	254.936	51
133	MP_R1_F2	159.782	51
134	MP_R1_F2	203.338	44
135	MP_R1_F2	234.551	82
136	MP_R1_F2	65.355	23
137	MP_R1_F2	211.179	70
138	MP_R1_F2	140.083	43
139	MP_R1_F2	116.225	40
140	MP_R1_F2	120.711	36
141	MP_R1_F2	105.74	41
142	MP_R1_F2	34.385	11
143	MP_R1_F2	55.456	9
144	MP_R1_F2	70.184	21
145	MP_R1_F2	183.238	58
146	MP_R1_F2	42.385	14
147	MP_R1_F2	161.095	54
148	MP_R1_F2	39.456	14
149	MP_R1_F2	129.054	35
150	MP_R1_F2	57.355	19
151	MP_R1_F2	185.095	44
152	MP_R1_F2	125.054	38
153	MP_R1_F2	247.38	65
154	MP_R1_F2	124.912	36
155	MP_R1_F2	130.468	45
156	MP_R1_F2	135.296	36
157	MP_R1_F2	145.539	43
158	MP_R1_F2	83.497	29
159	MP_R1_F2	95.255	32
160	MP_R1_F2	114.225	35
161	MP_R1_F2	109.983	27
162	MP_R1_F2	108.569	24
163	MP_R1_F2	157.054	54
164	MP_R1_F2	142.368	47
165	MP_R1_F2	51.113	14
166	MP_R1_F2	215.723	65
167	MP_R1_F2	386.233	93
168	MP_R1_F2	361.647	105
169	MP_R1_F2	107.782	37
170	MP_R1_F2	99.397	25
171	MP_R1_F2	54.77	19
172	MP_R1_F2	166.167	49
173	MP_R1_F2	125.095	36
174	MP_R1_F2	157.196	52
175	MP_R1_F2	110.184	33
176	MP_R1_F2	61.941	23
177	MP_R1_F2	67.941	25
178	MP_R1_F2	98.527	30
179	MP_R1_F2	108.083	39
180	MP_R1_F2	173.924	54
181	MP_R1_F2	290.735	99
182	MP_R1_F2	56.77	21
183	MP_R1_F2	254.978	75
184	MP_R1_F2	236.108	66
185	MP_R1_F2	286.167	55
186	MP_R1_F2	241.037	74
187	MP_R1_F2	135.782	33
188	MP_R1_F2	274.25	81
189	MP_R1_F2	49.698	14
190	MP_R1_F2	202.652	64
191	MP_R1_F2	214.936	78
192	MP_R1_F2	128.953	33
193	MP_R1_F2	169.439	35
194	MP_R1_F2	119.64	36
195	MP_R1_F2	166.953	43
196	MP_R1_F2	220.409	75
197	MP_R1_F2	172.409	55
198	MP_R1_F2	65.113	14
199	MP_R1_F2	248.551	75
200	MP_R1_F2	140.468	31
201	MP_R1_F2	113.882	34
202	MP_R1_F2	153.782	45
203	MP_R1_F2	131.64	47
204	MP_R1_F2	84.083	31
205	MP_R1_F2	65.355	20
206	MP_R1_F2	94.326	28
207	MP_R1_F2	246.551	41
208	MP_R1_F2	260.007	46
209	MP_R1_F2	248.936	64
210	MP_R1_F2	255.765	75
211	MP_R1_F2	159.439	53
212	MP_R1_F2	270.108	78
213	MP_R1_F2	208.267	63
214	MP_R1_F2	69.941	21
215	MP_R1_F2	155.723	52
216	MP_R1_F2	74.326	21
217	MP_R1_F2	81.255	23
218	MP_R1_F2	49.698	12
219	MP_R1_F2	74.083	23
220	MP_R1_F2	236.007	52
221	MP_R1_F2	219.439	87
222	MP_R1_F2	171.338	54
223	MP_R1_F2	150.468	35
224	MP_R1_F2	147.882	25
225	MP_R1_F2	119.054	44
226	MP_R1_F2	275.765	54
227	MP_R1_F2	220.652	54
228	MP_R1_F2	175.782	46
229	MP_R1_F2	101.255	27
230	MP_R1_F2	105.74	30
231	MP_R1_F2	62.527	15
232	MP_R1_F2	242.551	78
233	MP_R1_F2	183.238	55
234	MP_R1_F2	202.995	71
235	MP_R1_F2	52.527	15
236	MP_R1_F2	213.421	71
237	MP_R1_F2	168.409	59
238	MP_R1_F2	216.652	62
239	MP_R1_F2	44.971	7
240	MP_R1_F2	204.752	56
241	MP_R1_F2	94.669	27
242	MP_R1_F2	262.593	91
243	MP_R1_F2	259.279	76
244	MP_R1_F2	59.841	18
245	MP_R1_F2	117.882	43
246	MP_R1_F2	146.267	51
247	MP_R1_F2	163.196	51
248	MP_R1_F2	84.426	27
249	MP_R1_F2	302.049	71
250	MP_R1_F2	152.51	45
251	MP_R1_F2	75.698	17
252	MP_R1_F2	98.912	25
253	MP_R1_F2	76.184	22
254	MP_R1_F2	44.87	14
255	MP_R1_F2	249.765	78
256	MP_R1_F2	96.326	22
257	MP_R1_F2	277.806	89
258	MP_R1_F2	124.468	40
259	MP_R1_F2	172.853	35
260	MP_R1_F2	244.652	76
261	MP_R1_F2	76.426	21
262	MP_R1_F2	233.421	73
263	MP_R1_F2	78.426	25
264	MP_R1_F2	98.426	24
265	MP_R1_F2	64.527	18
266	MP_R1_F2	52.527	18
267	MP_R1_F2	101.255	32
268	MP_R1_F2	112.811	35
269	MP_R1_F2	36.627	13
270	MP_R1_F2	256.309	73
271	MP_R1_F2	309.505	88
272	MP_R1_F2	113.598	36
273	MP_R1_F2	374.96	104
274	MP_R1_F2	115.882	35
275	MP_R1_F2	214.309	59
276	MP_R1_F2	166.752	51
277	MP_R1_F2	129.539	28
278	MP_R1_F2	168.711	53
279	MP_R1_F2	77.598	22
280	MP_R1_F2	29.799	8
281	MP_R1_F2	242.593	57
282	MP_R1_F2	116.912	39
283	MP_R1_F2	193.581	66
284	MP_R1_F2	203.723	72
285	MP_R1_F2	130.468	35
286	MP_R1_F2	166.024	33
287	MP_R1_F2	285.765	65
288	MP_R1_F2	60.87	11
289	MP_R1_F2	122.368	36
290	MP_R1_F2	122.184	21
291	MP_R1_F2	117.154	29
292	MP_R1_F2	139.054	52
293	MP_R1_F2	75.355	14
294	MP_R1_F2	128.853	48
295	MP_R1_F2	145.64	53
296	MP_R1_F2	101.882	22
297	MP_R1_F2	270.25	88
298	MP_R1_F2	100.083	33
299	MP_R1_F2	146.267	40
300	MP_R1_F2	298.007	69
301	MP_R1_F2	265.966	81
302	MP_R1_F2	288.049	71
303	MP_R1_F2	251.563	71
304	MP_R1_F2	120.468	36
305	MP_R1_F2	179.622	64
306	MP_R1_F2	190.752	60
307	MP_R1_F2	108.426	28
308	MP_R1_F2	71.841	21
309	MP_R1_F2	125.154	32
310	MP_R1_F2	167.924	37
311	MP_R1_F2	174.167	41
312	MP_R1_F2	190.711	38
313	MP_R1_F2	237.279	88
314	MP_R1_F2	160.125	48
315	MP_R1_F2	203.037	59
316	MP_R1_F2	288.836	89
317	MP_R1_F2	96.083	26
318	MP_R1_F2	66.77	19
319	MP_R1_F2	268.451	82
320	MP_R1_F2	125.196	42
321	MP_R1_F2	153.539	57
322	MP_R1_F2	263.522	82
323	MP_R1_F2	79.841	27
324	MP_R1_F2	140.953	42
325	MP_R1_F2	138.569	51
326	MP_R1_F2	70.77	24
327	MP_R1_F2	76.426	25
328	MP_R1_F2	42.042	12
329	MP_R1_F2	120.711	40
330	MP_R1_F2	249.966	69
331	MP_R1_F2	209.137	59
332	MP_R1_F2	195.137	63
333	MP_R1_F2	155.196	44
334	MP_R1_F2	114.569	35
335	MP_R1_F2	192.652	46
336	MP_R1_F2	107.64	28
337	MP_R1_F2	266.049	74
338	MP_R1_F2	88.912	29
339	MP_R1_F2	250.149	69
340	MP_R1_F2	216.066	64
341	MP_R1_F2	109.154	31
342	MP_R1_F2	127.397	27
343	MP_R1_F2	85.012	31
344	MP_R1_F2	89.64	33
345	MP_R1_F2	283.421	67
346	MP_R1_F2	72.184	20
347	MP_R1_F2	170.953	66
348	MP_R1_F2	70.87	26
349	MP_R1_F2	38.627	14
350	MP_R1_F2	136.024	46
351	MP_R1_F2	258.534	75
352	MP_R1_F2	115.74	38
353	MP_R1_F2	45.556	21
354	MP_R1_F2	349.463	125
355	MP_R1_F2	210.451	68
356	MP_R1_F2	150.066	44
357	MP_R1_F2	119.882	47
358	MP_R1_F2	44.627	10
359	MP_R1_F2	116.912	42
360	MP_R1_F2	238.936	71
361	MP_R1_F2	91.497	28
362	MP_R1_F2	42.971	17
363	MP_R1_F2	104.912	30
364	MP_R1_F2	218.451	68
365	MP_R1_F2	161.823	44
366	MP_R1_F2	92.326	23
367	MP_R1_F2	189.296	49
368	MP_R1_F2	78.083	23
369	MP_R1_F2	198.451	71
370	MP_R1_F2	278.735	76
371	MP_R1_F2	198.208	63
372	MP_R1_F2	214.007	68
373	MP_R1_F2	108.225	34
374	MP_R1_F2	103.983	31
375	MP_R1_F2	91.355	27
376	MP_R1_F2	86.184	25
377	MP_R1_F2	87.841	27
378	MP_R1_F2	245.581	69
379	MP_R1_F2	110.669	27
380	MP_R1_F2	222.066	87
381	MP_R1_F2	41.698	11
382	MP_R1_F2	121.296	32
383	MP_R1_F2	105.397	32
384	MP_R1_F2	170.125	47
385	MP_R1_F2	214.693	66
386	MP_R1_F2	239.137	74
387	MP_R1_F2	191.095	59
388	MP_R1_F2	78.912	22
389	MP_R1_F2	44.284	13
390	MP_R1_F2	49.598	16
391	MP_R1_F2	287.563	81
392	MP_R1_F2	85.598	26
393	MP_R1_F2	184.024	65
394	MP_R1_F2	112.468	31
395	MP_R1_F2	228.551	63
396	MP_R1_F2	190.167	56
397	MP_R1_F2	61.941	22
398	MP_R1_F2	235.137	80
399	MP_R1_F2	81.841	22
400	MP_R1_F2	198.51	54
401	MP_R1_F2	145.681	45
402	MP_R1_F2	48.042	11
403	MP_R1_F2	68.426	22
404	MP_R1_F2	207.279	55
405	MP_R1_F2	76.326	24
406	MP_R1_F2	123.64	33
407	MP_R1_F2	189.238	59
408	MP_R1_F2	149.882	46
409	MP_R1_F2	52.284	15
410	MP_R1_F2	90.083	22
411	MP_R1_F2	103.64	24
412	MP_R1_F2	128.711	42
413	MP_R1_F2	53.941	18
414	MP_R1_F2	214.894	61
415	MP_R1_F2	127.782	31
416	MP_R1_F2	113.296	45
417	MP_R1_F2	226.551	57
418	MP_R1_F2	258.007	82
419	MP_R1_F2	145.338	45
420	MP_R1_F2	126.811	47
421	MP_R1_F2	270.551	60
422	MP_R1_F2	115.397	24
423	MP_R1_F2	338.149	130
424	MP_R1_F2	257.48	90
425	MP_R1_F2	152.024	58
426	MP_R1_F2	73.698	27
427	MP_R1_F2	142.125	31
428	MP_R1_F2	181.095	39
429	MP_R1_F2	125.64	35
430	MP_R1_F2	181.782	51
431	MP_R1_F2	234.208	67
432	MP_R1_F2	220.693	74
433	MP_R1_F2	159.296	34
434	MP_R1_F2	93.154	23
435	MP_R1_F2	236.208	77
436	MP_R1_F2	153.539	42
437	MP_R1_F2	72.77	29
438	MP_R1_F2	38.142	8
439	MP_R1_F2	82.083	26
440	MP_R1_F2	107.296	38
441	MP_R1_F2	96.326	36
442	MP_R1_F2	103.154	41
443	MP_R1_F2	212.652	70
444	MP_R1_F2	42.485	19
445	MP_R1_F2	248.978	73
446	MP_R1_F2	105.983	35
447	MP_R1_F2	229.037	60
448	MP_R1_F2	232.652	63
449	MP_R1_F2	129.539	43
450	MP_R1_F2	212.024	54
451	MP_R1_F2	255.279	66
452	MP_R1_F2	67.012	25
453	MP_R1_F2	153.296	48
454	MP_R1_F2	134.125	41
455	MP_R1_F2	248.593	78
456	MP_R1_F2	203.681	47
457	MP_R1_F2	308.333	107
458	MP_R1_F2	270.492	80
459	MP_R1_F2	238.936	50
460	MP_R1_F2	49.698	14
461	MP_R1_F2	86.326	22
462	MP_R1_F2	123.054	33
463	MP_R1_F2	171.137	49
464	MP_R1_F2	144.125	55
465	MP_R1_F2	273.463	85
466	MP_R1_F2	209.48	65
467	MP_R1_F2	137.74	41
468	MP_R1_F2	168.953	51
469	MP_R1_F2	242.149	78
470	MP_R1_F2	89.983	35
471	MP_R1_F2	125.196	44
472	MP_R1_F2	303.38	65
473	MP_R1_F2	131.196	36
474	MP_R1_F2	174.066	55
475	MP_R1_F2	147.338	35
476	MP_R1_F2	206.995	43
477	MP_R1_F2	33.213	10
478	MP_R1_F2	121.397	37
479	MP_R1_F2	286.007	96
480	MP_R1_F2	40.042	11
481	MP_R1_F2	124.569	39
482	MP_R1_F2	156.024	39
483	MP_R1_F2	254.25	82
484	MP_R1_F2	44.87	15
485	MP_R1_F2	214.51	66
486	MP_R1_F2	39.456	13
487	MP_R1_F2	230.836	71
488	MP_R1_F2	208.995	69
489	MP_R1_F2	136.711	55
490	MP_R1_F2	184.167	58
491	MP_R1_F2	227.037	61
492	MP_R1_F2	209.38	58
493	MP_R1_F2	321.22	103
494	MP_R1_F2	176.61	56
495	MP_R1_F2	127.397	47
496	MP_R1_F2	128.953	35
497	MP_R1_F2	40.527	13
498	MP_R1_F2	351.446	66
499	MP_R1_F2	96.326	25
500	MP_R1_F2	212.652	67
501	MP_R1_F2	92.669	33
502	MP_R1_F2	259.522	67
503	MP_R1_F2	57.941	19
504	MP_R1_F2	212.652	68
505	MP_R1_F2	219.48	73
506	MP_R1_F2	195.095	58
507	MP_R1_F2	69.113	17
508	MP_R1_F2	123.054	46
509	MP_R1_F2	215.924	48
510	MP_R1_F2	302.007	94
511	MP_R1_F2	199.823	67
512	MP_R1_F2	134.267	51
513	MP_R1_F2	98.083	21
514	MP_R1_F2	40.627	11
515	MP_R1_F2	151.539	30
516	MP_R1_F2	321.161	97
517	MP_R1_F2	116.468	34
518	MP_R1_F2	40.142	12
519	MP_R1_F2	167.238	45
520	MP_R1_F2	155.782	54
521	MP_R1_F2	183.338	60
522	MP_R1_F2	239.522	51
523	MP_R1_F2	164.024	56
524	MP_R1_F2	75.012	24
525	MP_R1_F2	155.054	50
526	MP_R1_F2	151.924	46
527	MP_R1_F2	262.794	94
528	MP_R1_F2	60.284	19
529	MP_R1_F2	160.225	55
530	MP_R1_F2	266.451	93
531	MP_R1_F2	73.497	24
532	MP_R1_F2	101.983	24
533	MP_R1_F2	305.078	72
534	MP_R1_F2	173.823	68
535	MP_R1_F2	154.409	53
536	MP_R1_F2	263.078	75
537	MP_R1_F2	194.894	59
538	MP_R1_F2	96.912	34
539	MP_R1_F2	149.338	47
540	MP_R1_F2	100.225	32
541	MP_R1_F2	65.941	23
542	MP_R1_F2	224.995	54
543	MP_R1_F2	129.054	31
544	MP_R1_F2	66.184	20
545	MP_R1_F2	93.154	32
546	MP_R1_F2	58.77	20
547	MP_R1_F2	59.841	22
548	MP_R1_F2	135.539	36
549	MP_R1_F2	134.368	42
550	MP_R1_F2	260.794	52
551	MP_R1_F2	197.38	44
552	MP_R1_F2	87.355	31
553	MP_R1_F2	320.333	93
554	MP_R1_F2	64.042	13
555	MP_R1_F2	127.154	23
556	MP_R1_F2	176.995	56
557	MP_R1_F2	46.284	14
558	MP_R1_F2	76.527	17
559	MP_R1_F2	128.61	37
560	MP_R1_F2	60.77	22
561	MP_R1_F2	280.149	92
562	MP_R1_F2	165.983	23
563	MP_R1_F2	101.841	21
564	MP_R1_F2	298.534	92
565	MP_R1_F2	68.184	26
566	MP_R1_F2	207.095	34
567	MP_R1_F2	186.267	54
568	MP_R1_F2	91.497	23
569	MP_R1_F2	117.497	46
570	MP_R1_F2	175.581	68
571	MP_R1_F2	209.38	51
572	MP_R1_F2	70.426	16
573	MP_R1_F2	125.196	37
574	MP_R1_F2	95.983	29
575	MP_R1_F2	85.397	28
576	MP_R1_F2	293.22	82
577	MP_R1_F2	61.598	20
578	MP_R1_F2	128.225	39
579	MP_R1_F2	62.426	17
580	MP_R1_F2	180.652	52
581	MP_R1_F2	248.35	54
582	MP_R1_F2	157.681	50
583	MP_R1_F2	58.77	21
584	MP_R1_F2	170.853	48
585	MP_R1_F2	61.941	17
586	MP_R1_F2	205.338	48
587	MP_R1_F2	265.22	78
588	MP_R1_F2	51.941	17
589	MP_R1_F2	99.983	28
590	MP_R1_F2	145.196	34
591	MP_R1_F2	64.426	25
592	MP_R1_F2	256.551	48
593	MP_R1_F2	213.723	59
594	MP_R1_F2	248.208	72
595	MP_R1_F2	220.794	72
596	MP_R1_F2	173.581	53
597	MP_R1_F2	93.74	30
598	MP_R1_F2	109.397	27
599	MP_R1_F2	49.698	15
600	MP_R1_F2	205.137	64
601	MP_R1_F2	254.836	82
602	MP_R1_F2	323.806	75
603	MP_R1_F2	269.765	97
604	MP_R1_F2	69.598	23
605	MP_R1_F2	94.811	23
606	MP_R1_F2	59.698	17
607	MP_R1_F2	333.262	76
608	MP_R1_F2	177.924	58
609	MP_R1_F2	222.108	82
610	MP_R1_F2	65.941	27
611	MP_R1_F2	105.539	33
612	MP_R1_F2	177.238	60
613	MP_R1_F2	53.113	15
614	MP_R1_F2	91.255	29
615	MP_R1_F2	186.51	49
616	MP_R1_F2	51.113	16
617	MP_R1_F2	122.711	35
618	MP_R1_F2	154.368	52
619	MP_R1_F2	342.333	108
620	MP_R1_F2	330.635	85
621	MP_R1_F2	40.385	14
622	MP_R1_F2	149.095	45
623	MP_R1_F2	72.083	22
624	MP_R1_F2	223.338	65
625	MP_R1_F2	169.823	60
626	MP_R1_F2	71.355	18
627	MP_R1_F2	242.108	75
628	MP_R1_F2	31.456	12
629	MP_R1_F2	75.255	23
630	MP_R1_F2	273.279	79
631	MP_R1_F2	84.77	19
632	MP_R1_F2	148.652	50
633	MP_R1_F2	106.368	31
634	MP_R1_F2	196.409	48
635	MP_R1_F2	265.078	84
636	MP_R1_F2	123.338	39
637	MP_R1_F2	206.551	77
638	MP_R1_F2	142.368	42
639	MP_R1_F2	155.924	47
640	MP_R1_F2	84.326	28
641	MP_R1_F2	121.882	34
642	MP_R1_F2	168.024	55
643	MP_R1_F2	247.966	74
644	MP_R1_F2	110.125	28
645	MP_R1_F2	401.73	140
646	MP_R1_F2	273.907	82
647	MP_R1_F2	118.468	45
648	MP_R1_F2	149.196	43
649	MP_R1_F2	77.841	28
650	MP_R1_F2	50.042	9
651	MP_R1_F2	125.983	42
652	MP_R1_F2	138.368	47
653	MP_R1_F2	42.284	16
654	MP_R1_F2	237.037	73
655	MP_R1_F2	274.149	85
656	MP_R1_F2	56.284	22
657	MP_R1_F2	177.681	51
658	MP_R1_F2	114.569	36
659	MP_R1_F2	54.042	17
660	MP_R1_F2	113.64	35
661	MP_R1_F2	267.179	79
662	MP_R1_F2	180.995	36
663	MP_R1_F2	221.38	63
664	MP_R1_F2	37.213	10
665	MP_R1_F2	50.87	15
666	MP_R1_F2	79.355	14
667	MP_R1_F2	277.865	84
668	MP_R1_F2	201.137	52
669	MP_R1_F2	165.681	42
670	MP_R1_F2	133.782	37
671	MP_R1_F2	71.355	17
672	MP_R1_F2	36.627	12
673	MP_R1_F2	335.948	103
674	MP_R1_F2	64.284	13
675	MP_R1_F2	291.806	99
676	MP_R1_F2	238.451	57
677	MP_R1_F2	213.48	57
678	MP_R1_F2	229.765	64
679	MP_R1_F2	44.87	14
680	MP_R1_F2	61.598	17
681	MP_R1_F2	82.669	24
682	MP_R1_F2	35.213	11
683	MP_R1_F2	54.042	11
684	MP_R1_F2	41.556	6
685	MP_R1_F2	57.456	13
686	MP_R1_F2	196.61	59
687	MP_R1_F2	182.811	52
688	MP_R1_F2	157.681	51
689	MP_R1_F2	138.083	39
690	MP_R1_F2	136.752	38
691	MP_R1_F2	86.326	22
692	MP_R1_F2	115.397	28
693	MP_R1_F2	248.108	79
694	MP_R1_F2	34.627	12
695	MP_R1_F2	131.054	26
696	MP_R1_F2	133.539	40
697	MP_R1_F2	257.38	62
698	MP_R1_F2	105.397	33
699	MP_R1_F2	84.426	19
700	MP_R1_F2	179.238	47
701	MP_R1_F2	136.083	37
702	MP_R1_F2	129.296	44
703	MP_R1_F2	203.581	54
704	MP_R1_F2	123.598	34
705	MP_R1_F2	159.983	49
706	MP_R1_F2	61.598	18
707	MP_R1_F2	131.054	36
708	MP_R1_F2	36.627	10
709	MP_R1_F2	179.681	46
710	MP_R1_F2	313.421	89
711	MP_R1_F2	351.404	98
712	MP_R1_F2	35.799	9
713	MP_R1_F2	271.622	58
714	MP_R1_F2	274.007	100
715	MP_R1_F2	130.711	47
716	MP_R1_F2	131.882	40
717	MP_R1_F2	222.652	65
718	MP_R1_F2	86.083	31
719	MP_R1_F2	196.794	70
720	MP_R1_F2	78.184	28
721	MP_R1_F2	199.681	51
722	MP_R1_F2	166.61	50
723	MP_R1_F2	170.167	55
724	MP_R1_F2	82.326	25
725	MP_R1_F2	157.681	45
726	MP_R1_F2	113.882	24
727	MP_R1_F2	210.551	66
728	MP_R1_F2	175.137	61
729	MP_R1_F2	148.853	51
730	MP_R1_F2	196.409	41
731	MP_R1_F2	127.196	33
732	MP_R1_F2	36.385	9
733	MP_R1_F2	35.213	10
734	MP_R1_F2	112.426	46
735	MP_R1_F2	76.426	24
736	MP_R1_F2	106.184	46
737	MP_R1_F2	243.421	69
738	MP_R1_F2	125.439	38
739	MP_R1_F2	199.581	59
740	MP_R1_F2	149.439	41
741	MP_R1_F2	83.255	26
742	MP_R1_F2	142.267	48
743	MP_R1_F2	57.355	15
744	MP_R1_F2	209.865	67
745	MP_R1_F2	183.338	52
746	MP_R1_F2	56.042	16
747	MP_R1_F2	169.823	64
748	MP_R1_F2	226.409	76
749	MP_R1_F2	209.723	64
750	MP_R1_F2	58.042	20
751	MP_R1_F2	159.338	41
752	MP_R1_F2	146.468	47
753	MP_R1_F2	185.439	61
754	MP_R1_F2	108.225	38
755	MP_R1_F2	163.723	46
756	MP_R1_F2	422.659	140
757	MP_R1_F2	281.22	89
758	MP_R1_F2	122.811	37
759	MP_R1_F2	174.267	59
760	MP_R1_F2	166.711	50
761	MP_R1_F2	41.456	14
762	MP_R1_F2	181.865	61
763	MP_R1_F2	238.108	59
764	MP_R1_F2	163.338	58
765	MP_R1_F2	162.894	50
766	MP_R1_F2	161.439	62
767	MP_R1_F2	141.439	36
768	MP_R1_F2	258.149	67
769	MP_R1_F2	135.64	48
770	MP_R1_F2	84.669	20
771	MP_R1_F2	114.953	32
772	MP_R1_F2	107.196	32
773	MP_R1_F2	231.078	74
774	MP_R1_F2	123.681	39
775	MP_R1_F2	47.213	15
776	MP_R1_F2	51.113	16
777	MP_R1_F2	84.083	31
778	MP_R1_F2	96.326	30
779	MP_R1_F2	182.894	53
780	MP_R1_F2	165.238	43
781	MP_R1_F2	45.698	13
782	MP_R1_F2	133.882	33
783	MP_R1_F2	105.154	31
784	MP_R1_F2	138.024	40
785	MP_R1_F2	53.113	19
786	MP_R1_F2	57.941	19
787	MP_R1_F2	96.912	27
788	MP_R1_F2	280.978	91
789	MP_R1_F2	246.108	82
790	MP_R1_F2	69.012	20
791	MP_R1_F2	274.049	75
792	MP_R1_F2	55.113	16
793	MP_R1_F2	160.711	51
794	MP_R1_F2	209.723	58
795	MP_R1_F2	269.522	91
796	MP_R1_F2	334.35	112
797	MP_R1_F2	164.368	55
798	MP_R1_F2	148.368	49
799	MP_R1_F2	301.321	99
800	MP_R1_F2	233.38	91
801	MP_R1_F2	97.983	31
802	MP_R1_F2	210.894	62
803	MP_R1_F2	44.284	15
804	MP_R1_F2	309.078	75
805	MP_R1_F2	224.652	67
806	MP_R1_F2	196.51	45
807	MP_R1_F2	259.765	78
808	MP_R1_F2	101.64	34
809	MP_R1_F2	297.463	87
810	MP_R1_F2	143.338	55
811	MP_R1_F2	97.74	36
812	MP_R1_F2	55.456	21
813	MP_R1_F2	185.095	48
814	MP_R1_F2	197.154	45
815	MP_R1_F2	293.622	89
816	MP_R1_F2	237.622	60
817	MP_R1_F2	101.497	33
818	MP_R1_F2	321.563	109
819	MP_R1_F2	38.042	11
820	MP_R1_F2	194.752	47
821	MP_R1_F2	82.426	22
822	MP_R1_F2	58.77	21
823	MP_R1_F2	197.581	60
824	MP_R1_F2	157.154	49
825	MP_R1_F2	49.698	14
826	MP_R1_F2	37.213	15
827	MP_R1_F2	117.882	36
828	MP_R1_F2	205.439	38
829	MP_R1_F2	214.309	53
830	MP_R1_F2	38.042	10
831	MP_R1_F2	172.409	35
832	MP_R1_F2	174.995	55
833	MP_R1_F2	65.113	19
834	MP_R1_F2	292.978	88
835	MP_R1_F2	47.113	15
836	MP_R1_F2	95.74	31
837	MP_R1_F2	85.841	19
838	MP_R1_F2	280.108	110
839	MP_R1_F2	114.125	32
840	MP_R1_F2	40.042	10
841	MP_R1_F2	193.723	55
842	MP_R1_F2	74.083	23
843	MP_R1_F2	218.936	70
844	MP_R1_F2	282.676	100
845	MP_R1_F2	190.167	54
846	MP_R1_F2	86.284	22
847	MP_R1_F2	207.966	58
848	MP_R1_F2	217.522	70
849	MP_R1_F2	267.865	71
850	MP_R1_F2	79.012	20
851	MP_R1_F2	61.355	17
852	MP_R1_F2	222.936	73
853	MP_R1_F2	239.865	74
854	MP_R1_F2	235.765	61
855	MP_R1_F2	194.409	41
856	MP_R1_F2	162.225	41
857	MP_R1_F2	151.841	33
858	MP_R1_F2	119.054	34
859	MP_R1_F2	312.392	77
860	MP_R1_F2	54.284	13
861	MP_R1_F2	219.338	51
862	MP_R1_F2	139.841	40
863	MP_R1_F2	186.409	55
864	MP_R1_F2	279.279	91
865	MP_R1_F2	186.468	53
866	MP_R1_F2	86.426	19
867	MP_R1_F2	206.693	59
868	MP_R1_F2	63.941	19
869	MP_R1_F2	193.338	43
870	MP_R1_F2	170.652	64
871	MP_R1_F2	48.284	16
872	MP_R1_F2	228.267	67
873	MP_R1_F2	302.049	105
874	MP_R1_F2	120.083	33
875	MP_R1_F2	36.627	13
876	MP_R1_F2	136.752	49
877	MP_R1_F2	123.255	40
878	MP_R1_F2	232.007	49
879	MP_R1_F2	53.456	15
880	MP_R1_F2	160.652	46
881	MP_R1_F2	186.995	46
882	MP_R1_F2	244.978	65
883	MP_R1_F2	80.326	23
884	MP_R1_F2	139.397	39
885	MP_R1_F2	35.456	10
886	MP_R1_F2	222.652	54
887	MP_R1_F2	127.296	43
888	MP_R1_F2	51.113	15
889	MP_R1_F2	197.439	68
890	MP_R1_F2	158.326	54
891	MP_R1_F2	255.723	67
892	MP_R1_F2	210.794	51
893	MP_R1_F2	122.125	36
894	MP_R1_F2	44.87	16
895	MP_R1_F2	232.995	69
896	MP_R1_F2	197.723	57
897	MP_R1_F2	101.054	30
898	MP_R1_F2	72.426	25
899	MP_R1_F2	190.267	51
900	MP_R1_F2	138.468	43
901	MP_R1_F2	104.225	33
902	MP_R1_F2	165.681	52
903	MP_R1_F2	76.912	24
904	MP_R1_F2	376.919	125
905	MP_R1_F2	186.167	62
906	MP_R1_F2	157.095	43
907	MP_R1_F2	210.652	63
908	MP_R1_F2	74.284	18
909	MP_R1_F2	151.054	47
910	MP_R1_F2	180.409	66
911	MP_R1_F2	172.409	56
912	MP_R1_F2	212.953	58
913	MP_R1_F2	46.042	15
914	MP_R1_F2	151.054	49
915	MP_R1_F2	98.326	31
916	MP_R1_F2	263.38	91
917	MP_R1_F2	218.51	68
918	MP_R1_F2	183.924	58
919	MP_R1_F2	88.426	30
920	MP_R1_F2	113.539	36
921	MP_R1_F2	71.598	23
922	MP_R1_F2	188.024	46
923	MP_R1_F2	143.196	46
924	MP_R1_F2	56.77	19
925	MP_R1_F2	69.841	20
926	MP_R1_F2	52.627	17
927	MP_R1_F2	42.042	9
928	MP_R1_F2	100.912	29
929	MP_R1_F2	222.208	63
930	MP_R1_F2	143.64	38
931	MP_R1_F2	134.225	54
932	MP_R1_F2	239.238	74
933	MP_R1_F2	191.48	49
[truncated: 62,395 more rows]

## Sheet: legend_microplastic_shape_param
Abbreviation	Explanation
Number of microplastic particle	Number of a single microplastic particle
Filter ID	Identifier of the filter on which the particle was located
Perimeter (µm)	Perimeter of a microplastic particle in µm
Width (µm)	Width of a microplastic particle in µm
